# Supplementary material for: A novel acid-catalyzed C5-alkylation of oxindoles using alcohols
Source: Royal Society of Chemistry journal article supplement (doi:10.1039/c0ob01144d), 2011-01-01
Supplement: c0ob01144d.pdf [file c0ob01144d.pdf]

Supplementary Material (ESI) for Organic & Biomolecular Chemistry  
This journal is (c) The Royal Society of Chemistry 2011

**A novel acid-catalyzed C5-alkylation of oxindoles using alcohols**

Chada Raji Reddy,<sup>a\*</sup> Erukonda Jithender,<sup>a</sup> Gaddam Krishna,<sup>a</sup> Gunreddy Venkat Reddy<sup>b</sup> and Bharatam  
Jagadeesh<sup>b</sup>

<sup>a</sup>Organic Division-I, Indian Institute of Chemical Technology, Hyderabad, India-500 607

<sup>b</sup>Center for NMR, Indian Institute of Chemical Technology, Hyderabad, India-500 607

[rajireddy@iict.res.in](mailto:rajireddy@iict.res.in)

Copies of DEPT-135, NOESY spectra for compound **3aa** and **3ba**

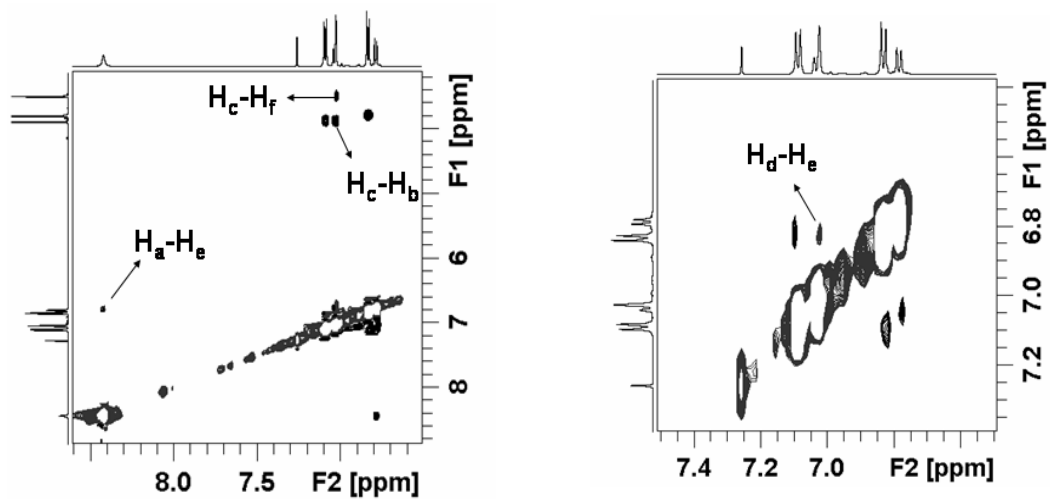

Expanded region of the NMR-NOESY spectrum of compound **3aa** (in  $CDCl_3$  at 298K at 600 MHz)

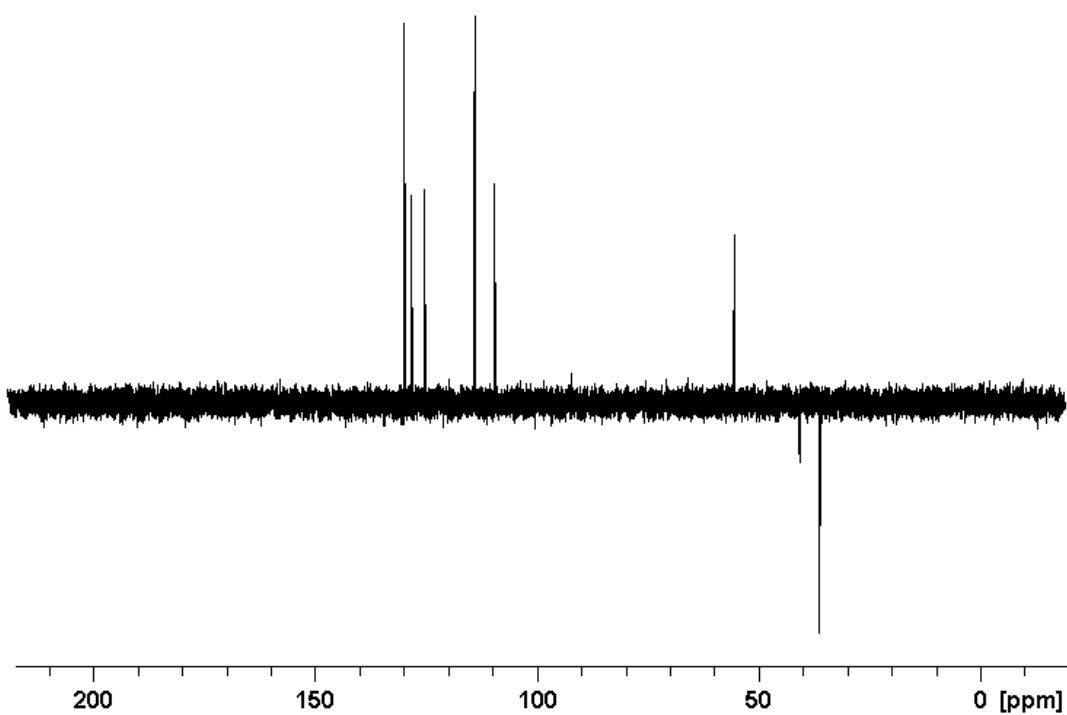

DEPT-135 spectrum of compound **3aa** in  $CDCl_3$  at 600 MHz

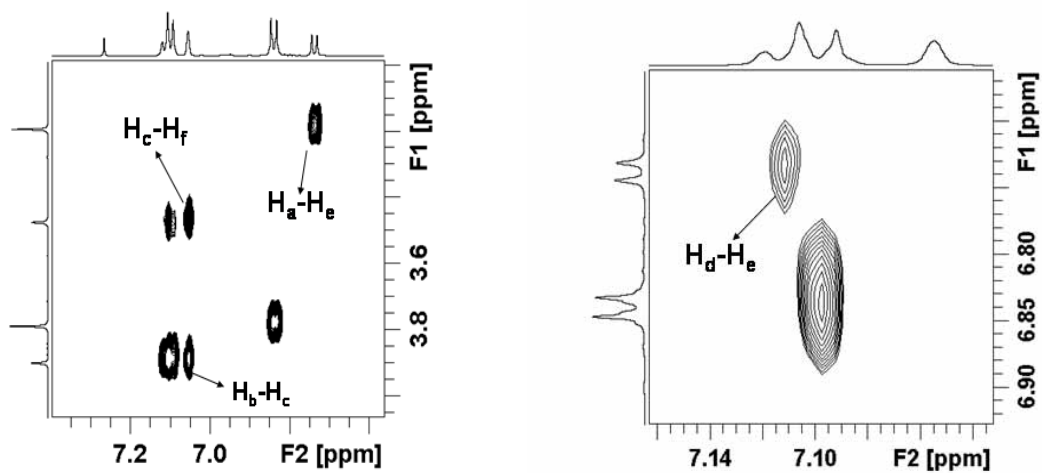

Expanded region of the NMR-NOESY spectrum of compound **3ba** (in  $CDCl_3$  at 298K at 600 MHz)

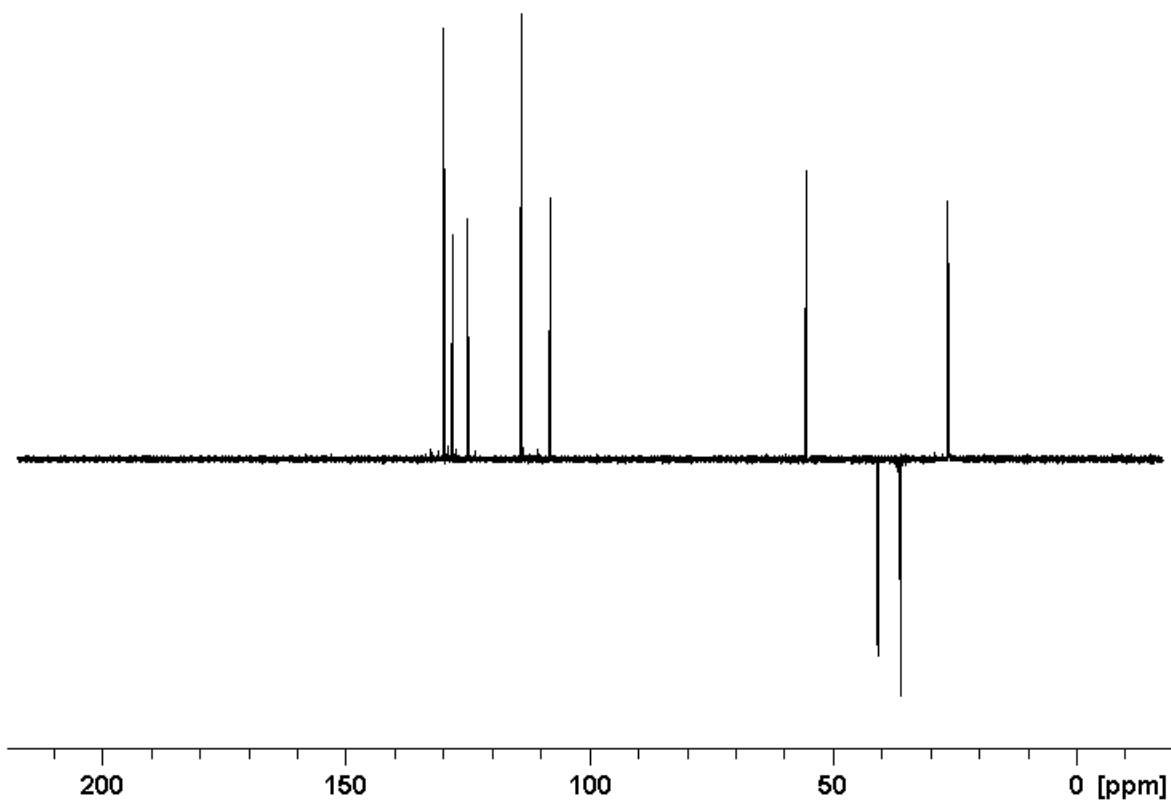

DEPT-135 spectrum of compound **3ba** in CDCl<sub>3</sub> at 600 MHz

Copies of <sup>1</sup>H and <sup>13</sup>C NMR spectra:

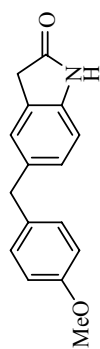

**3aa**

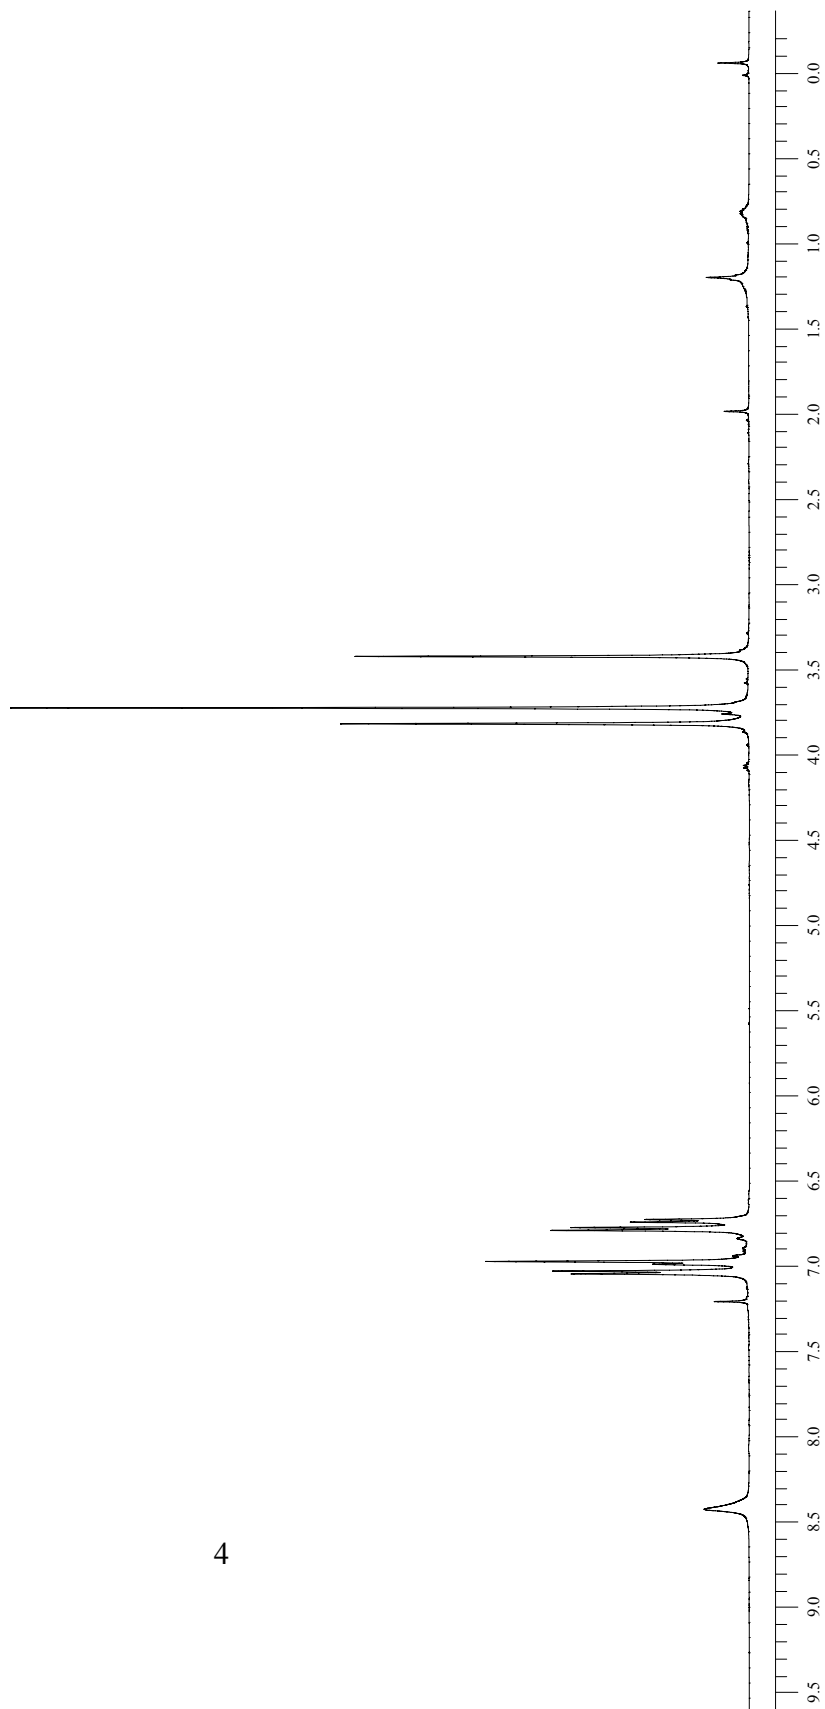

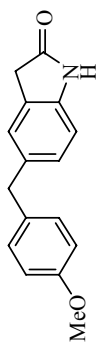

**3aa**

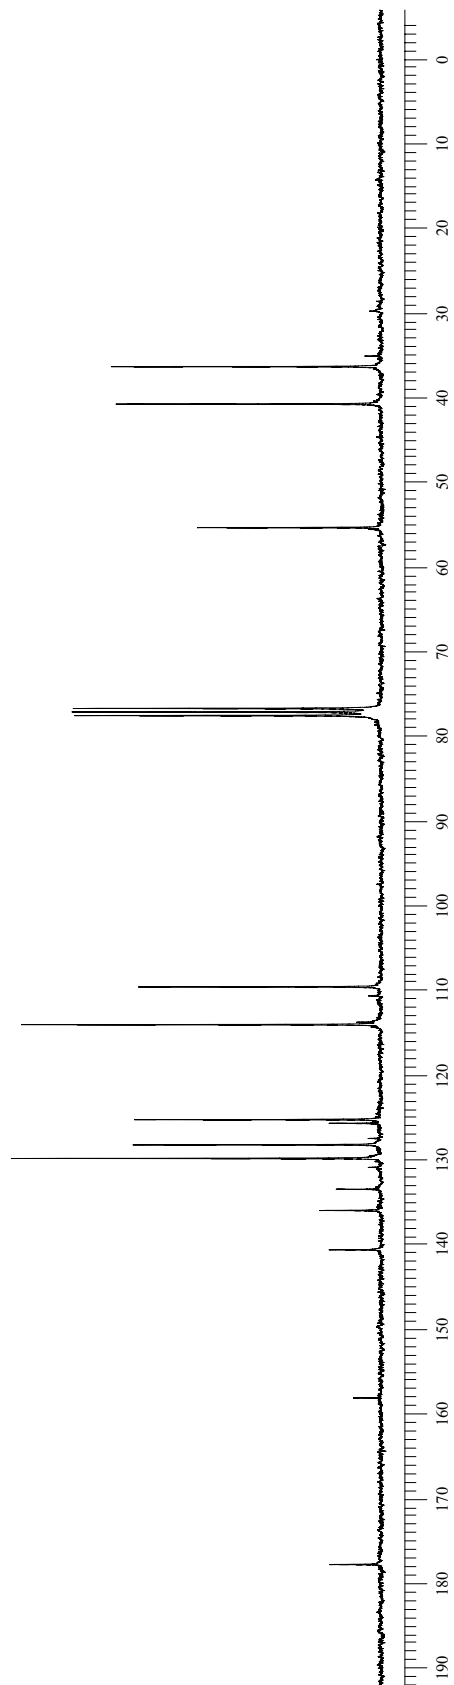

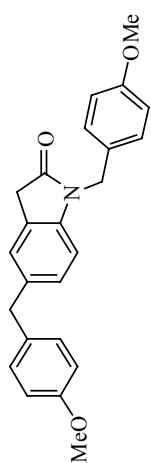

**3aa1**

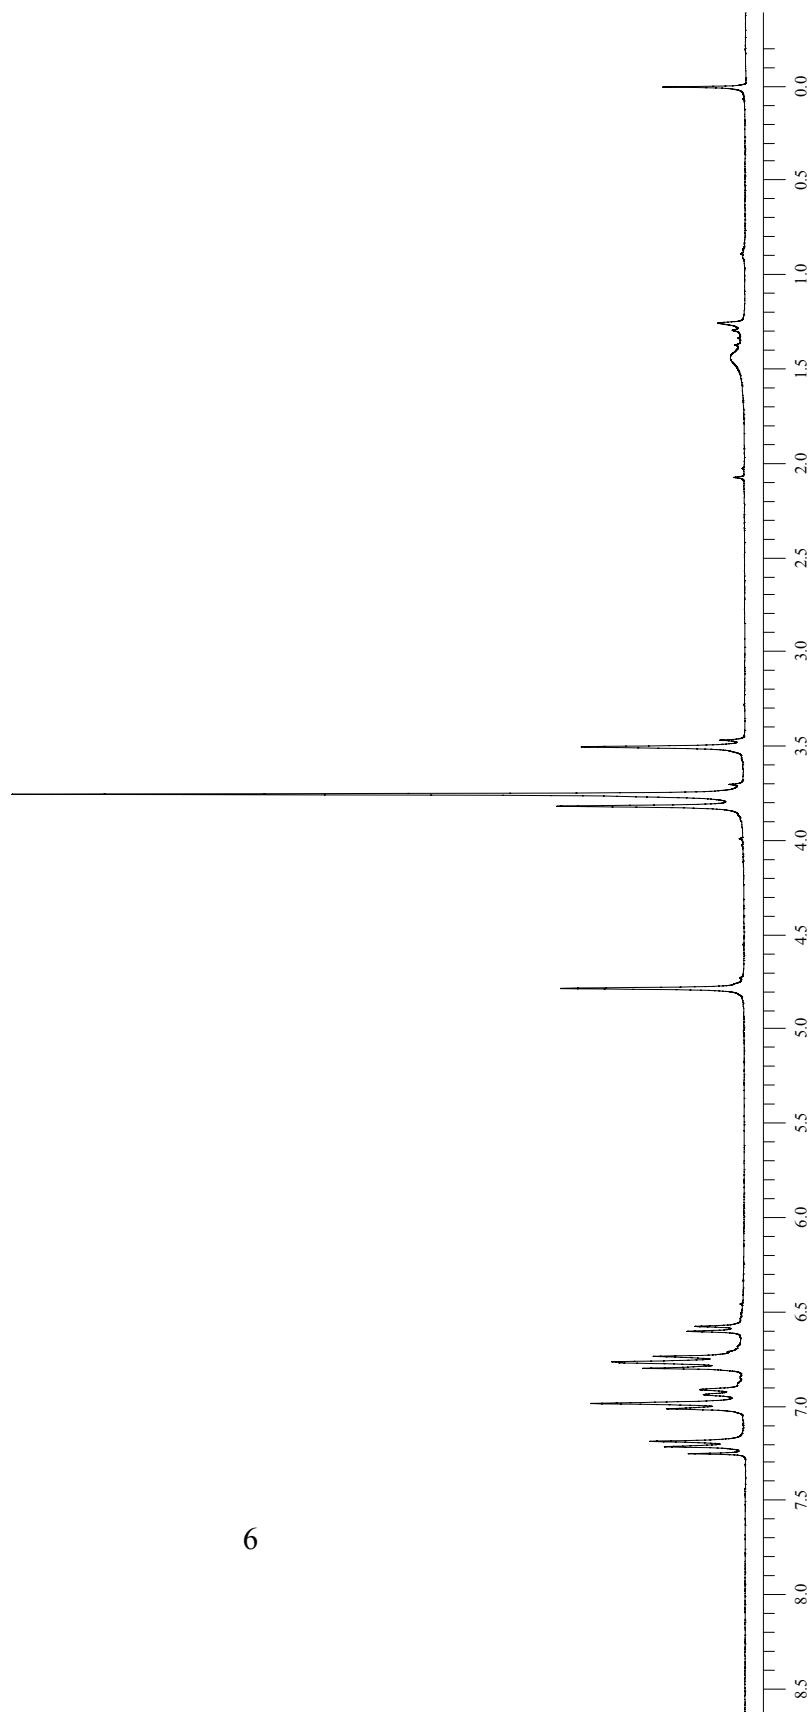

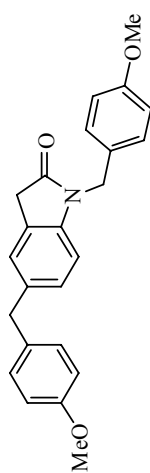

**3aa1**

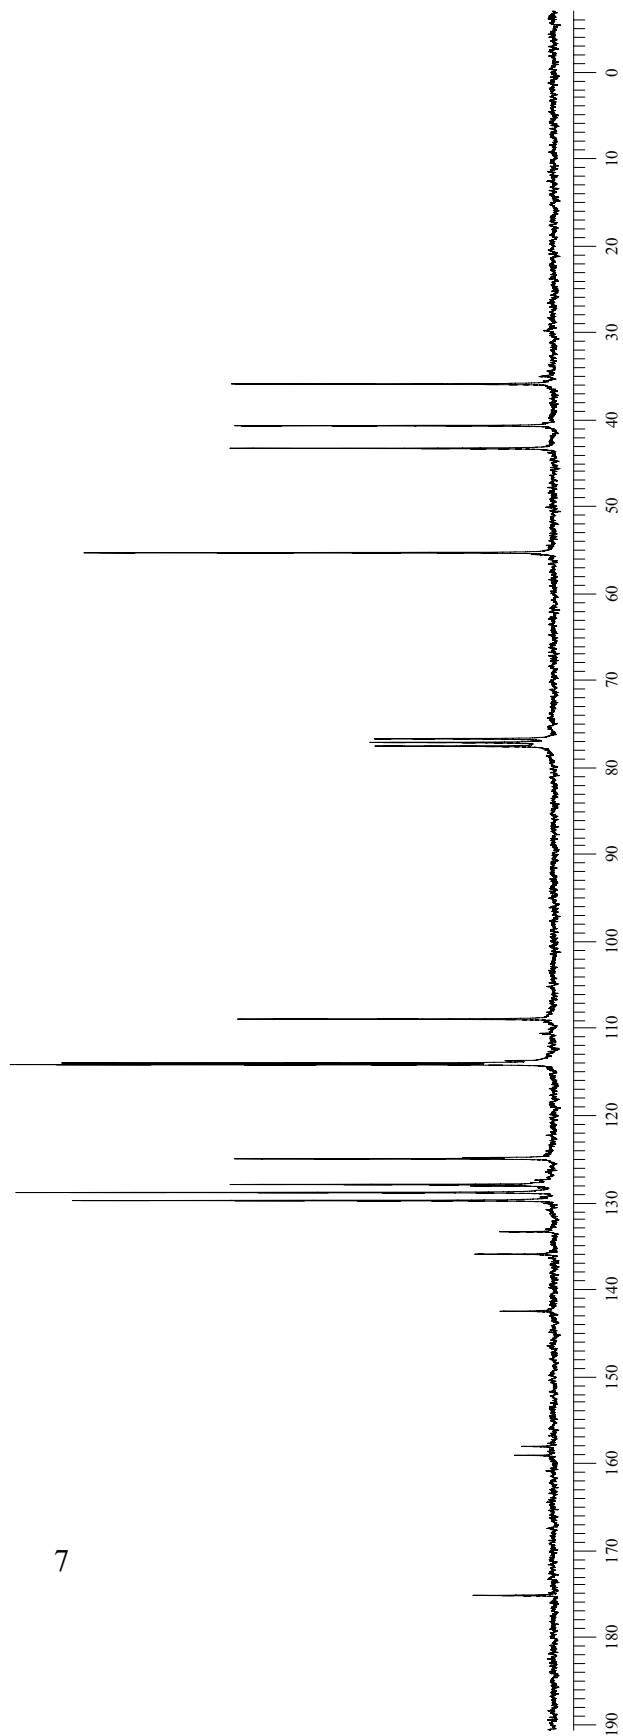

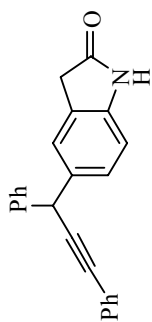

**3ab**

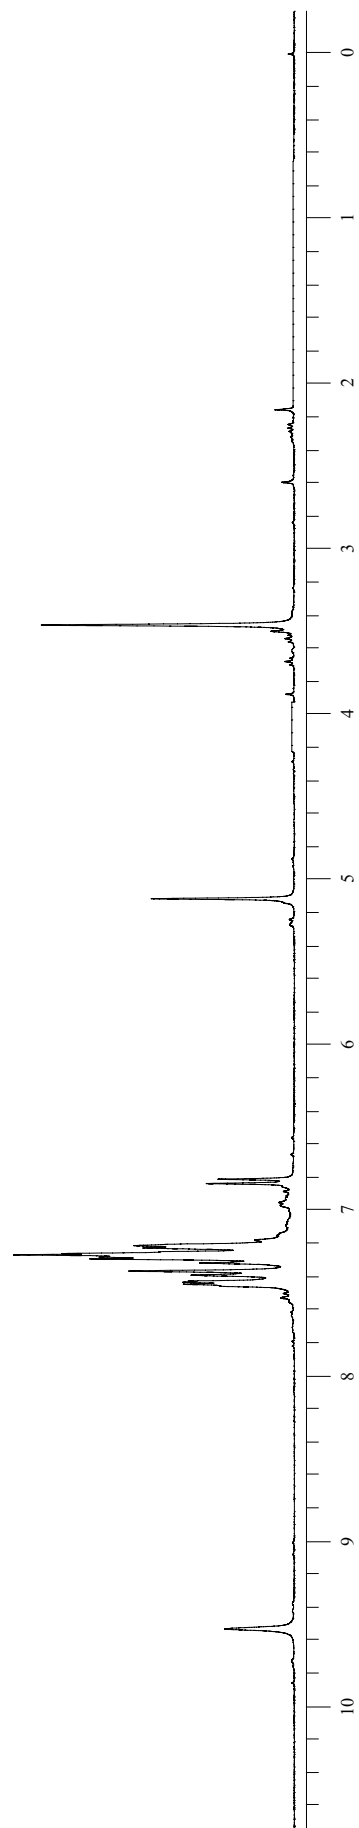



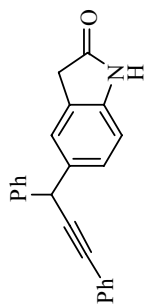

**3ab**

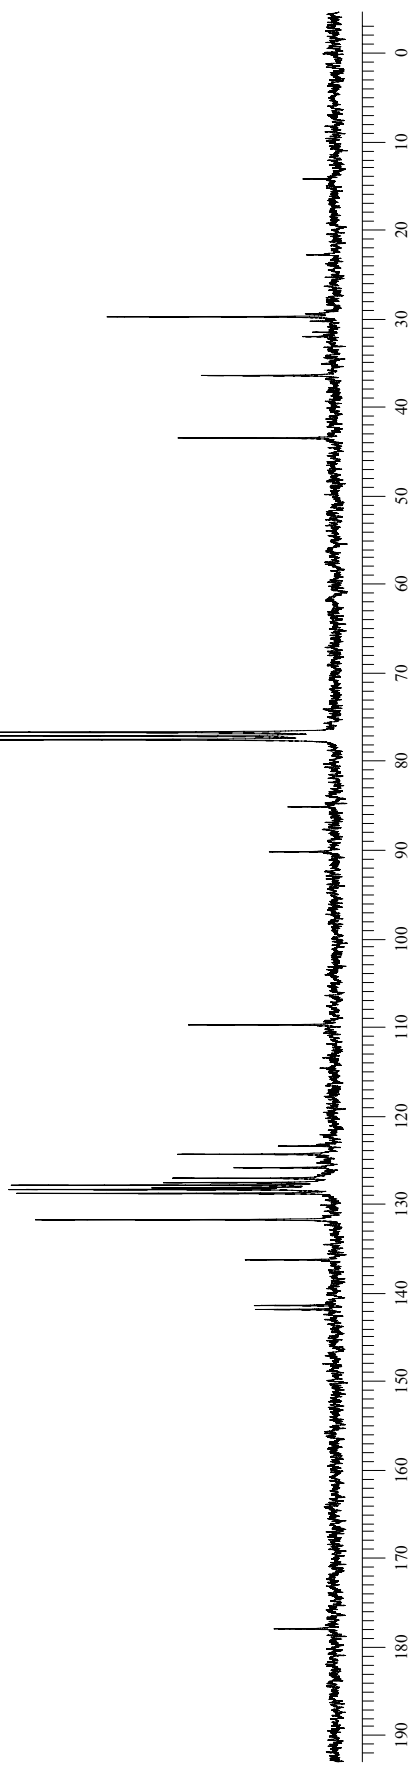

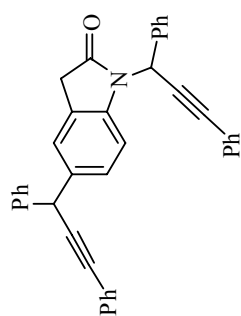

**3ab1**

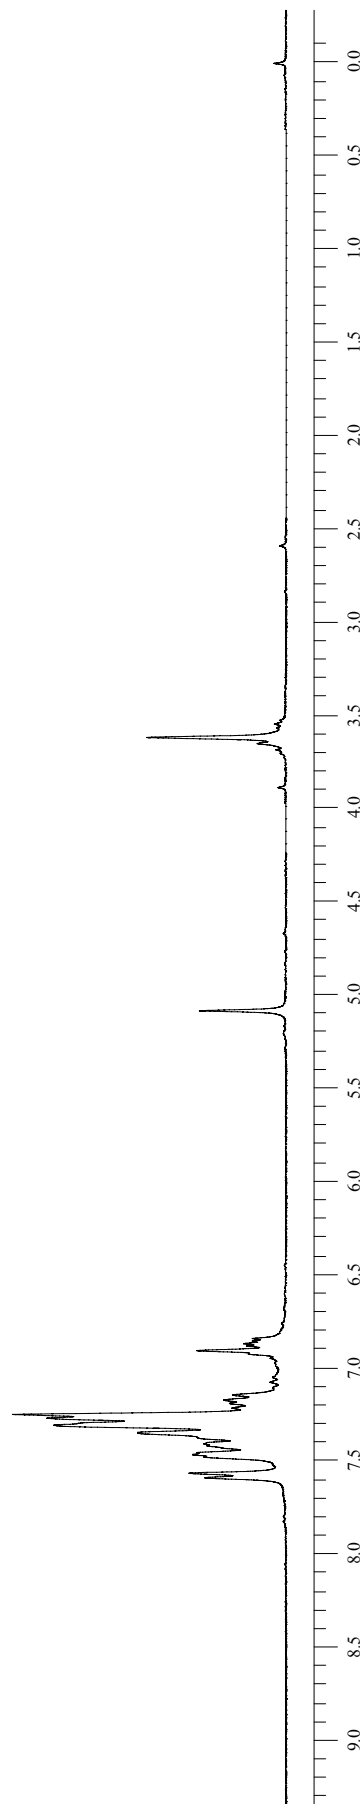

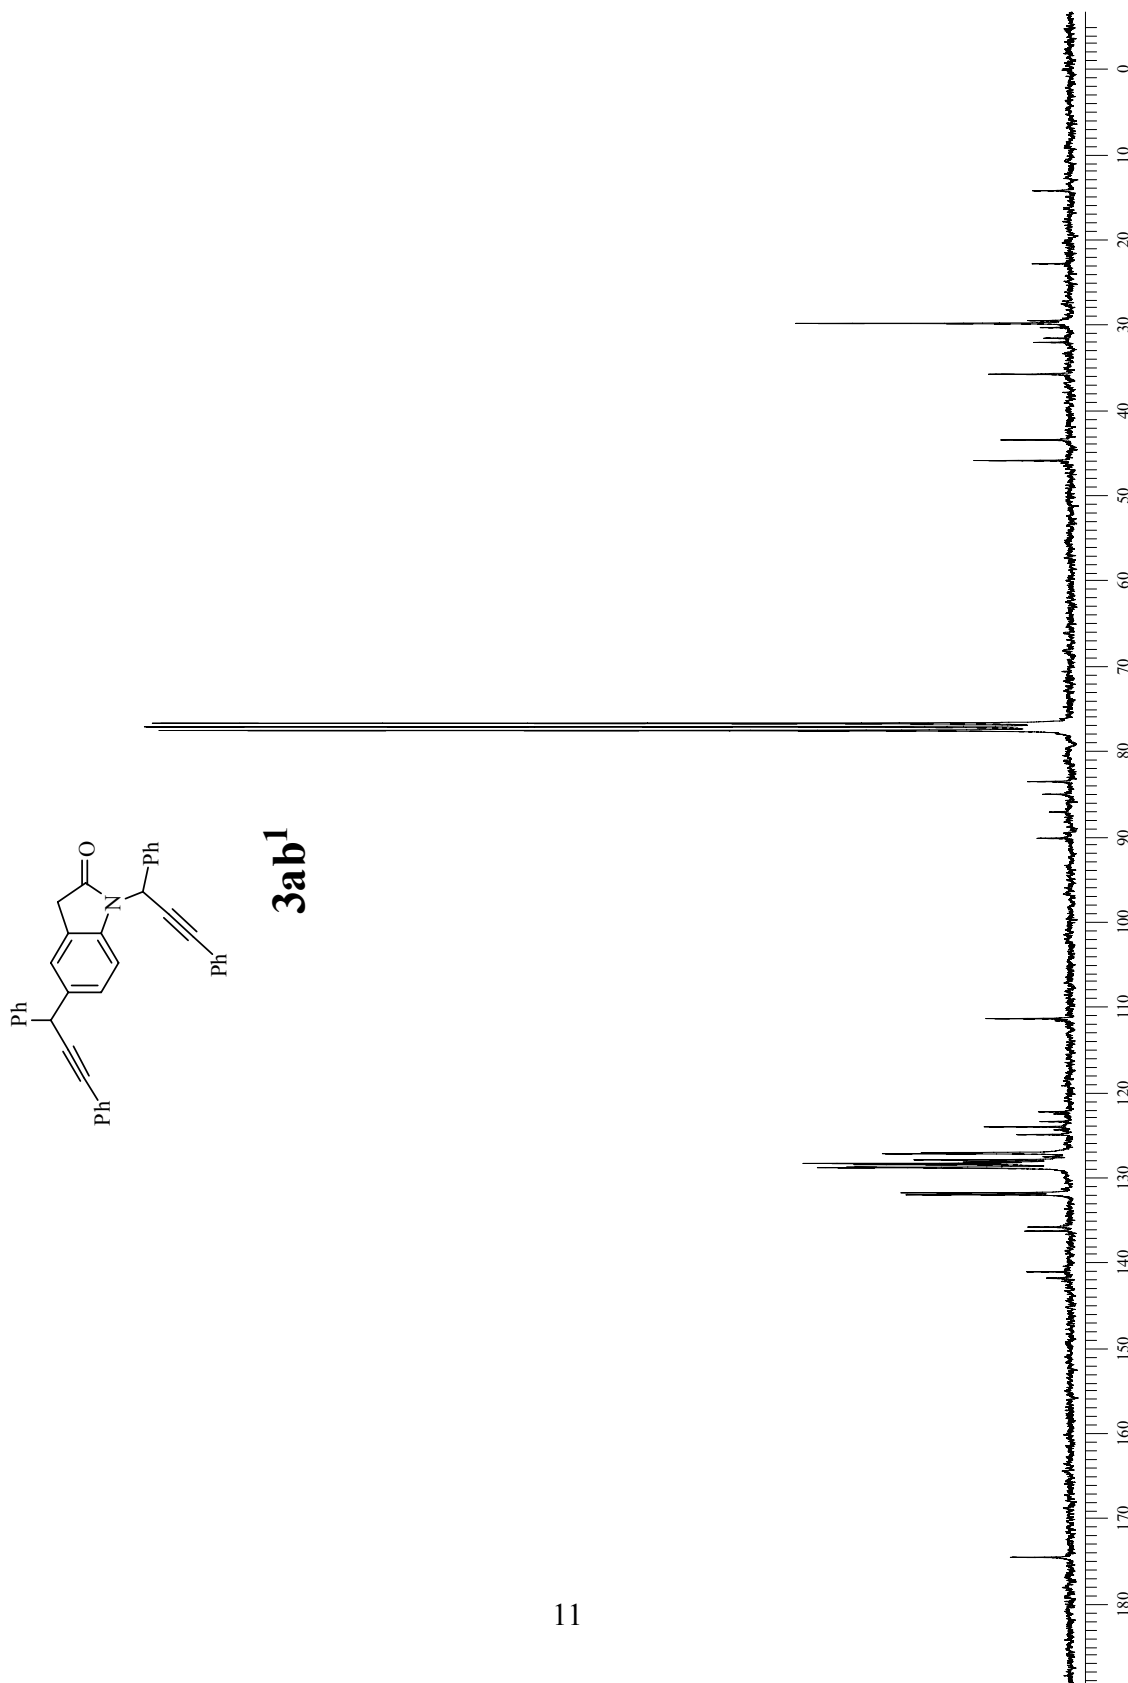

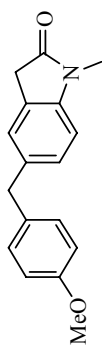

**3ba**

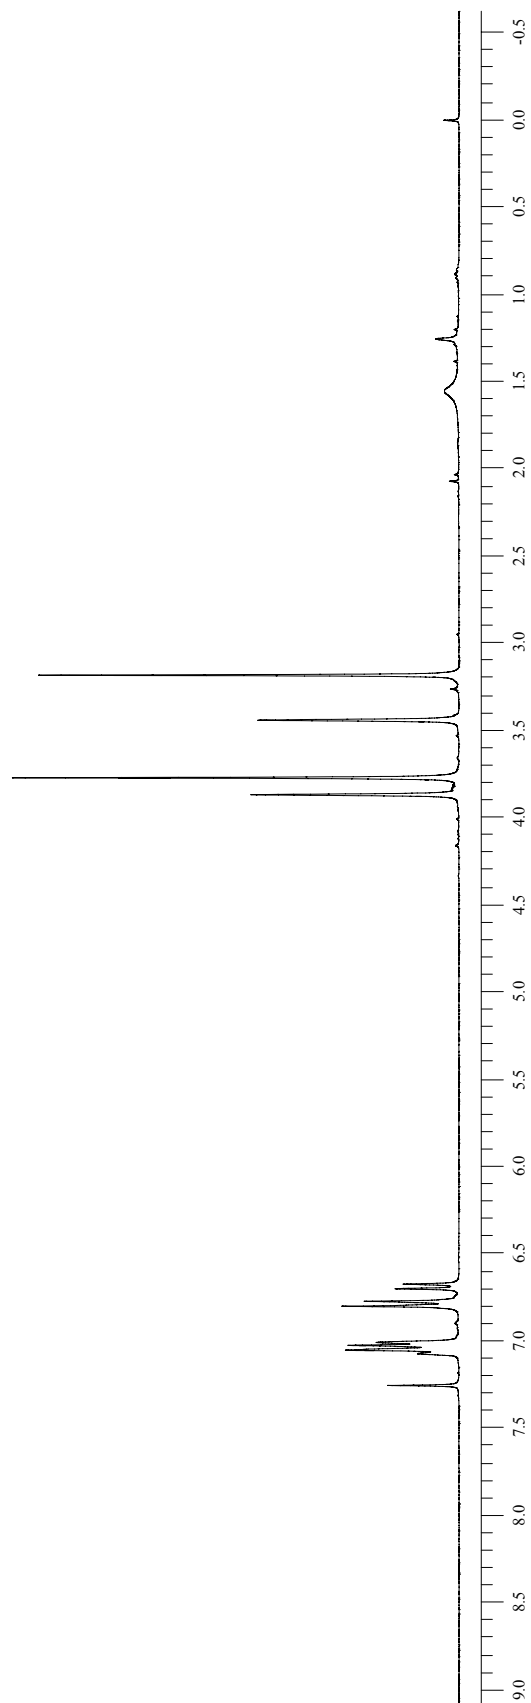

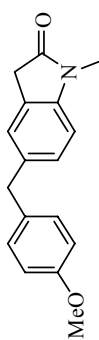

**3ba**

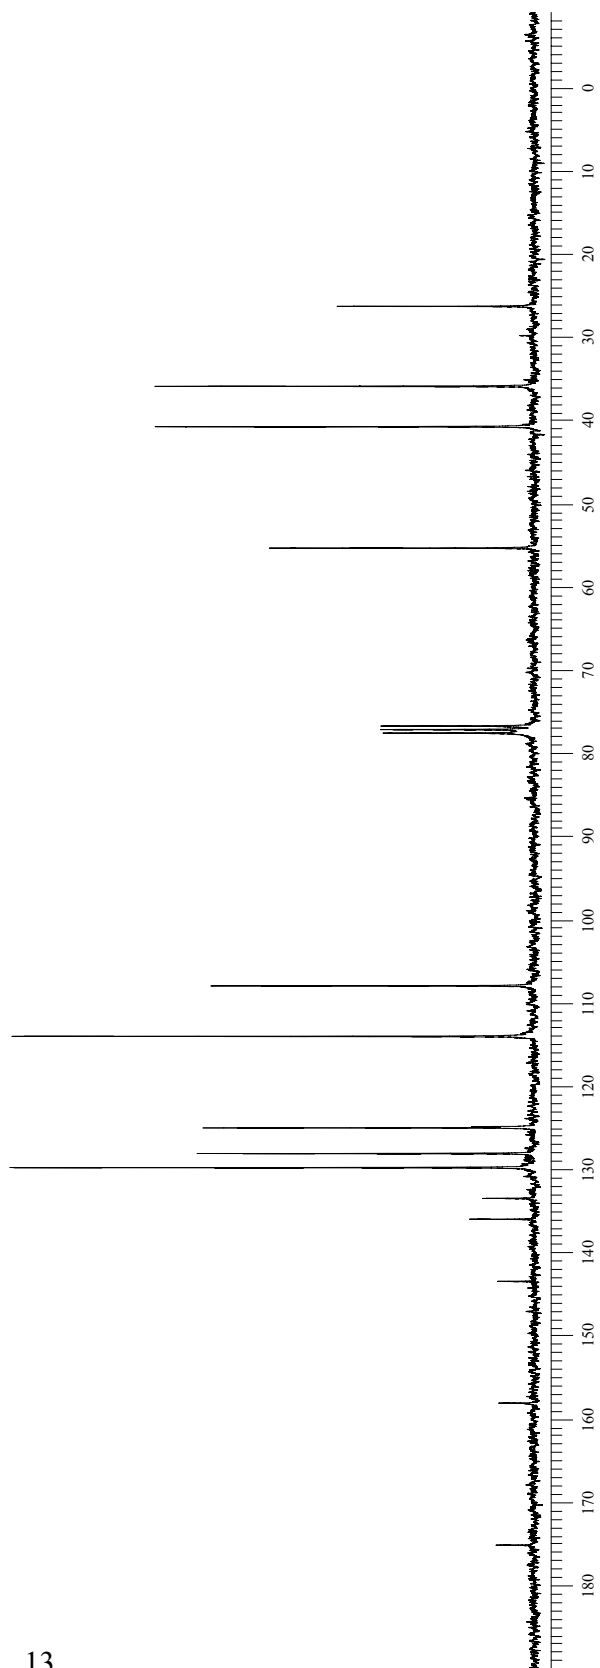

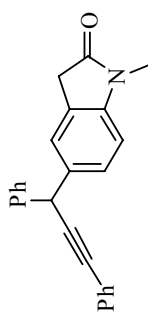

**3bb**

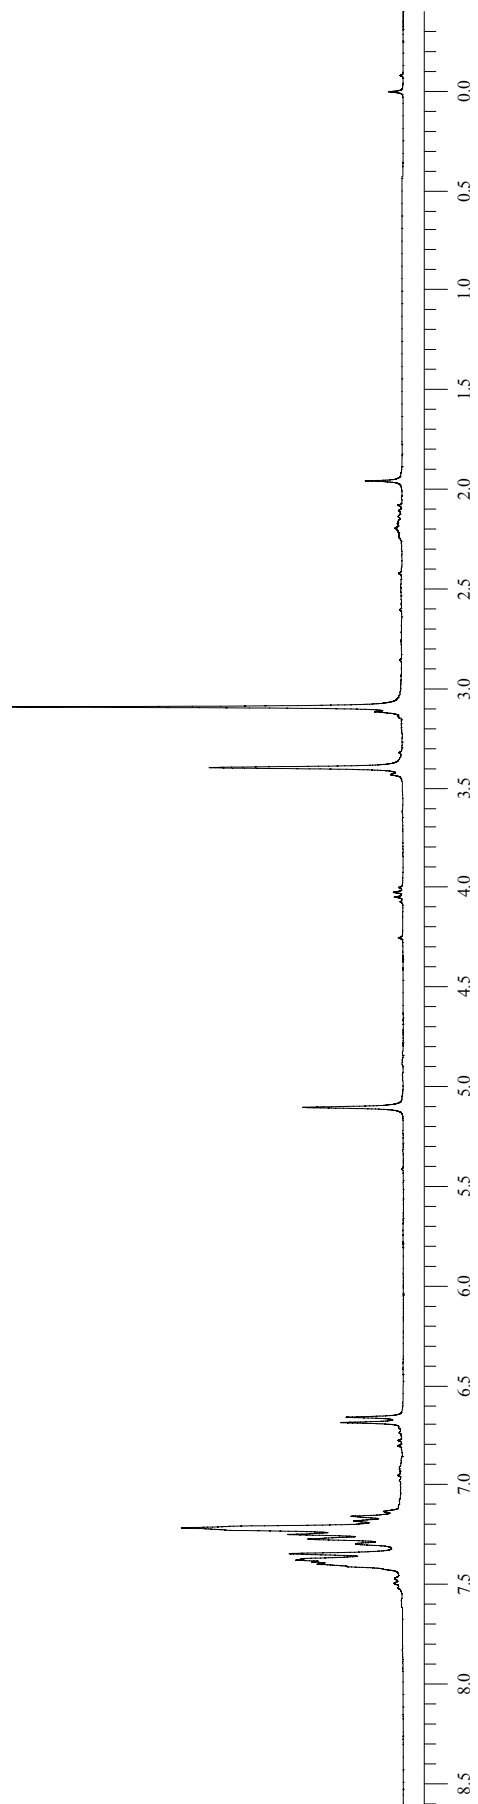

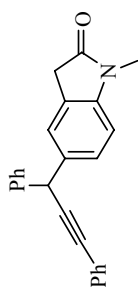

**3bb**

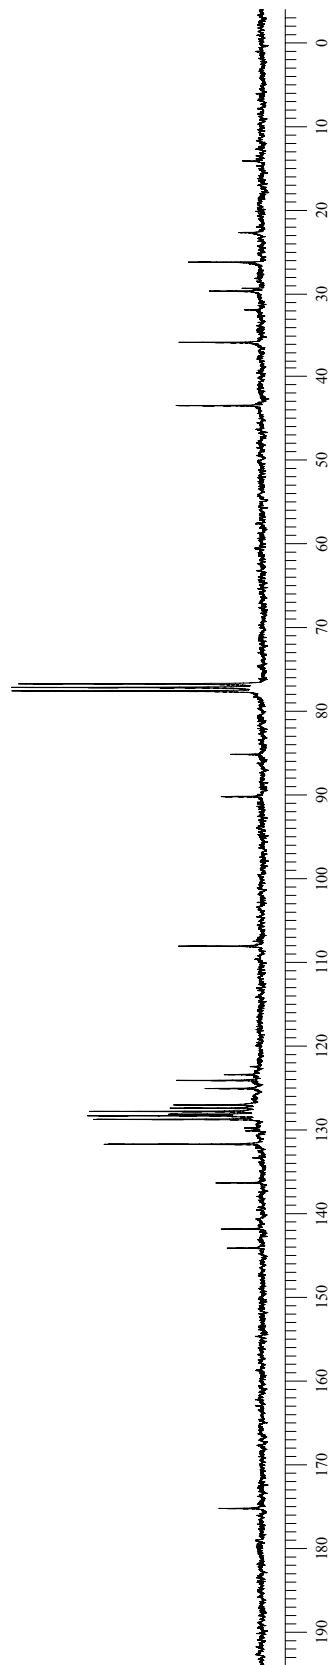

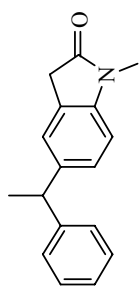

**3bc**

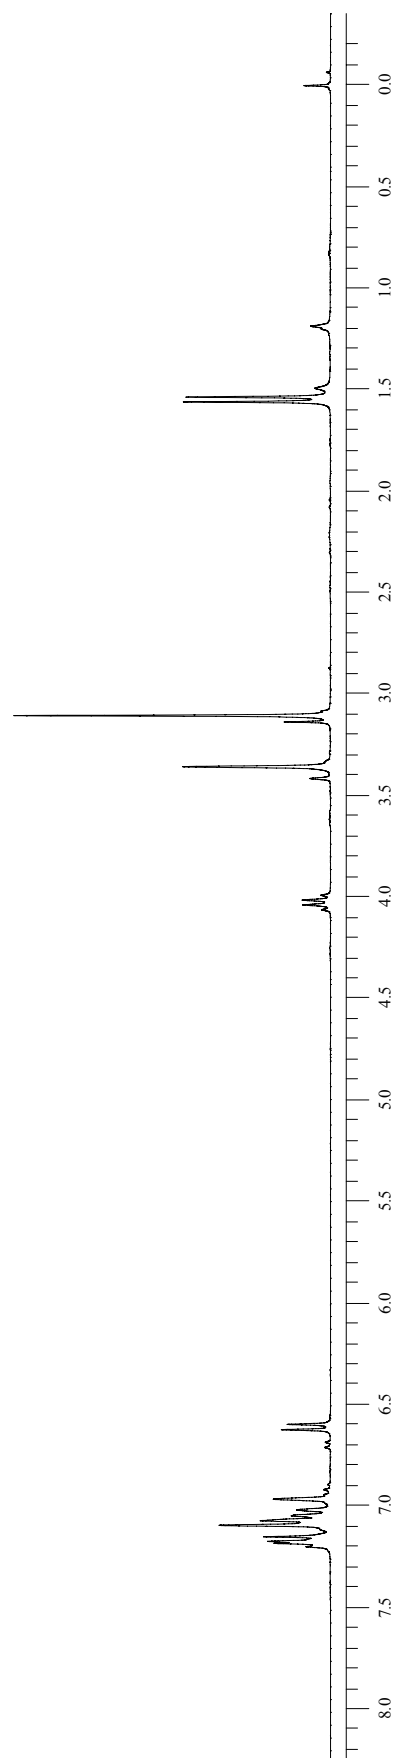



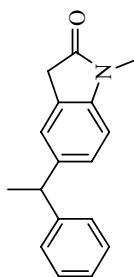

**3bc**

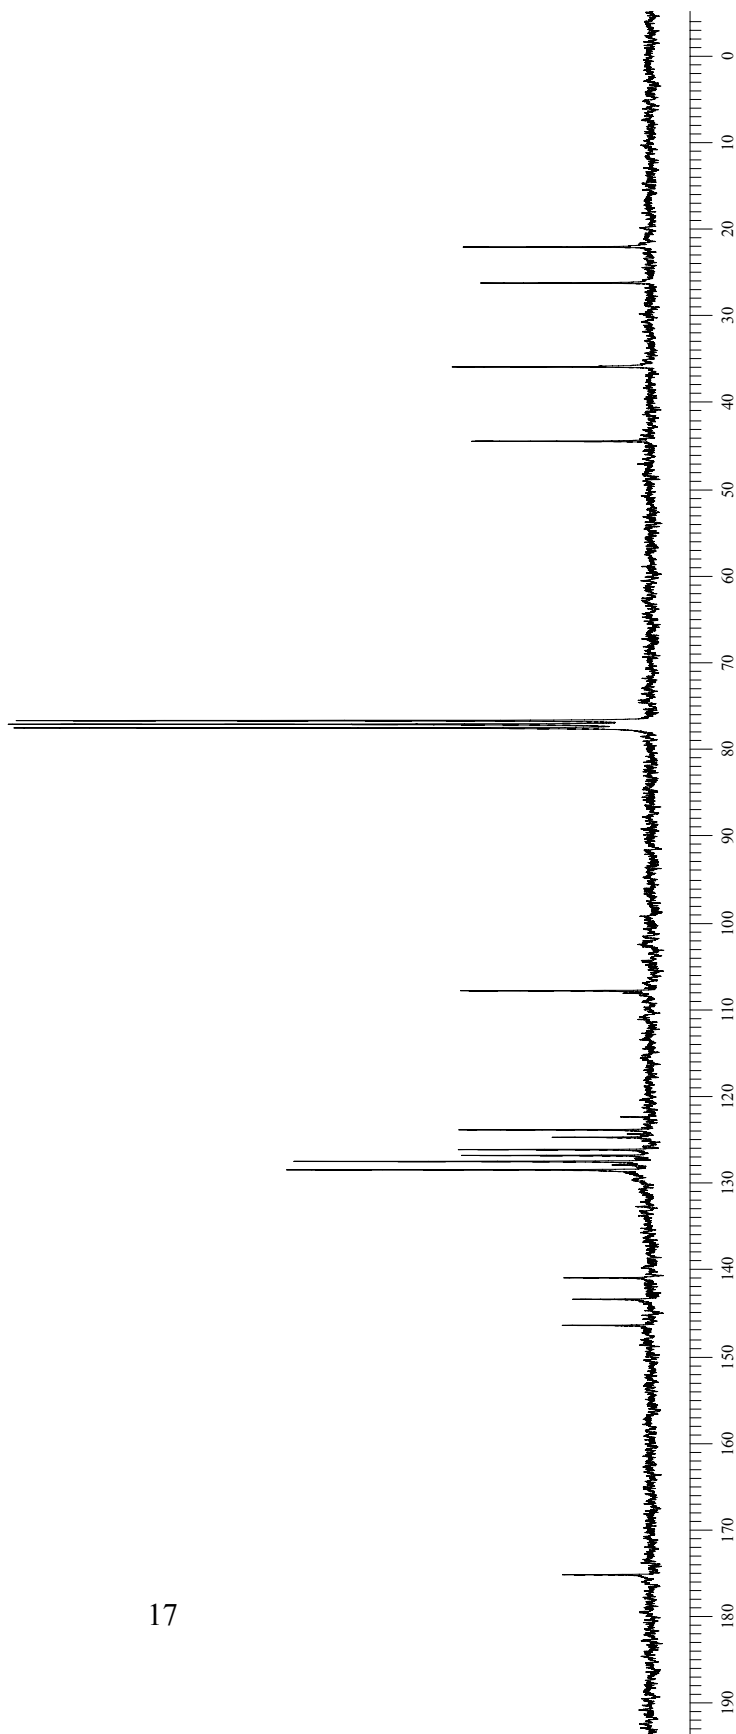

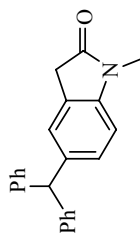

**3bd**

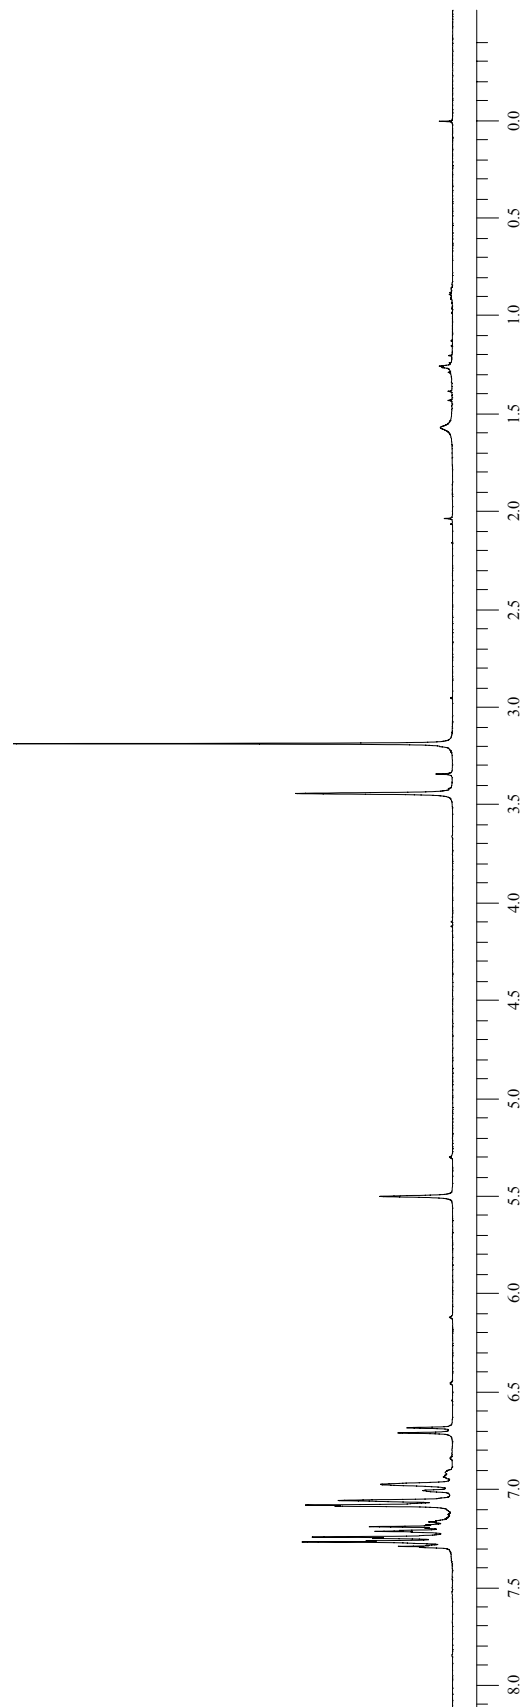

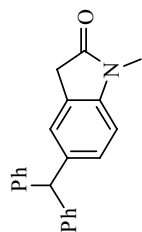

**3bd**

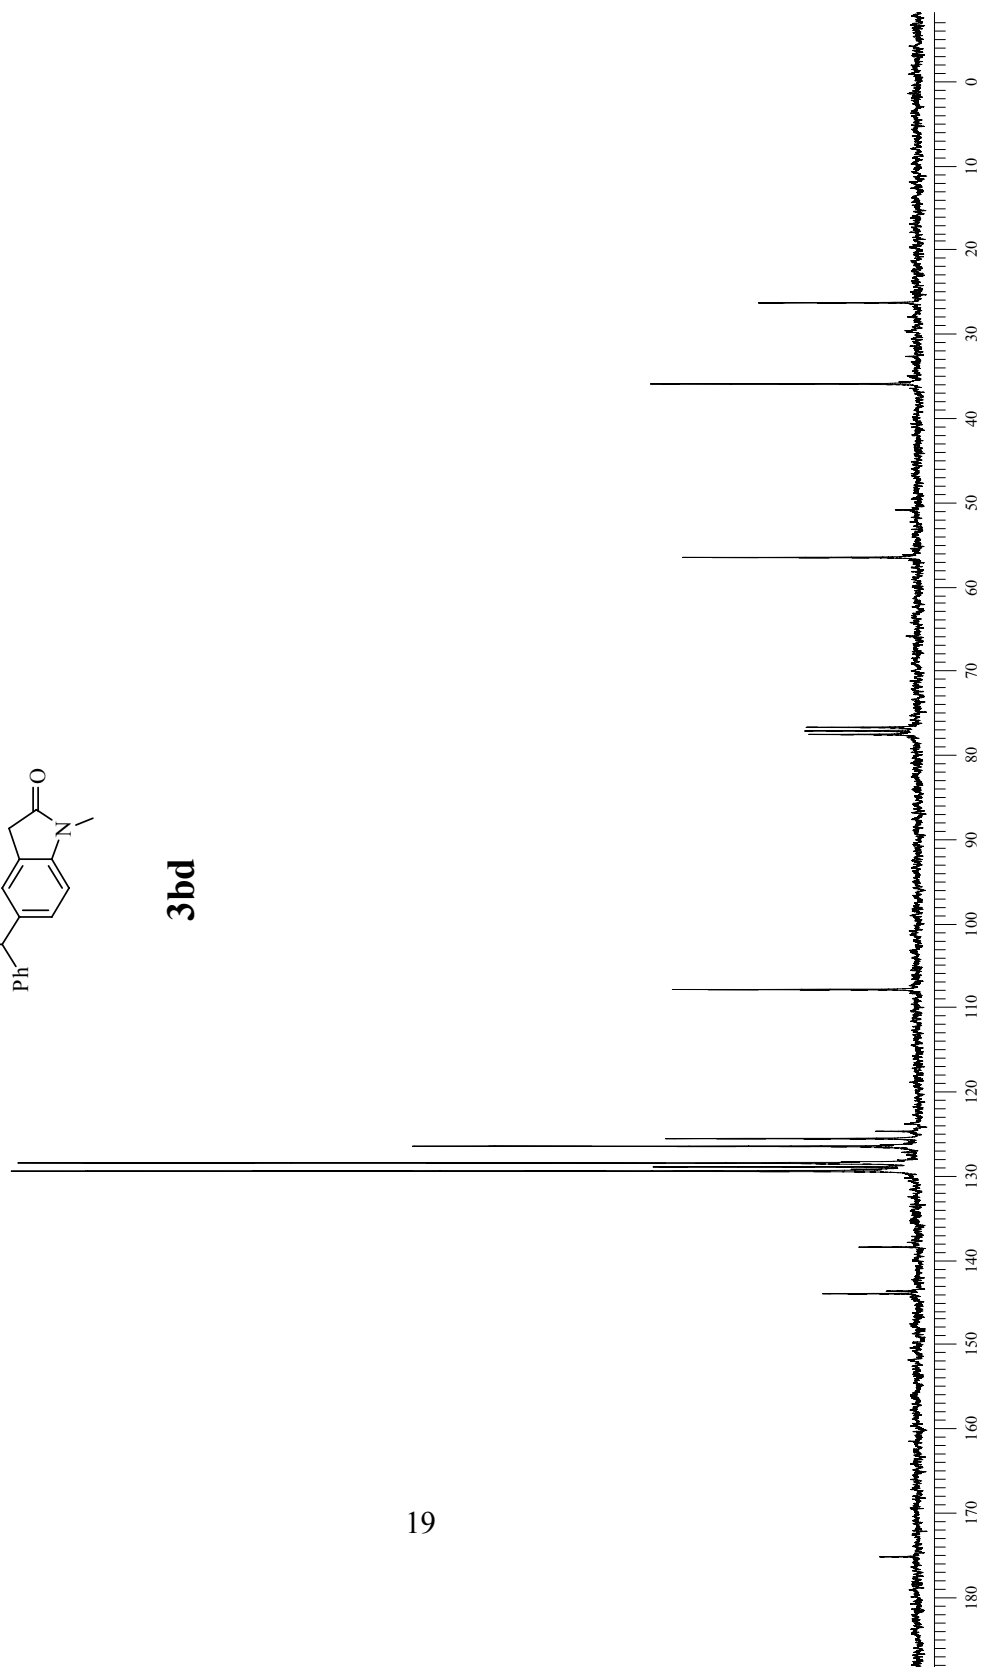

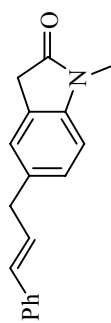

**3be**

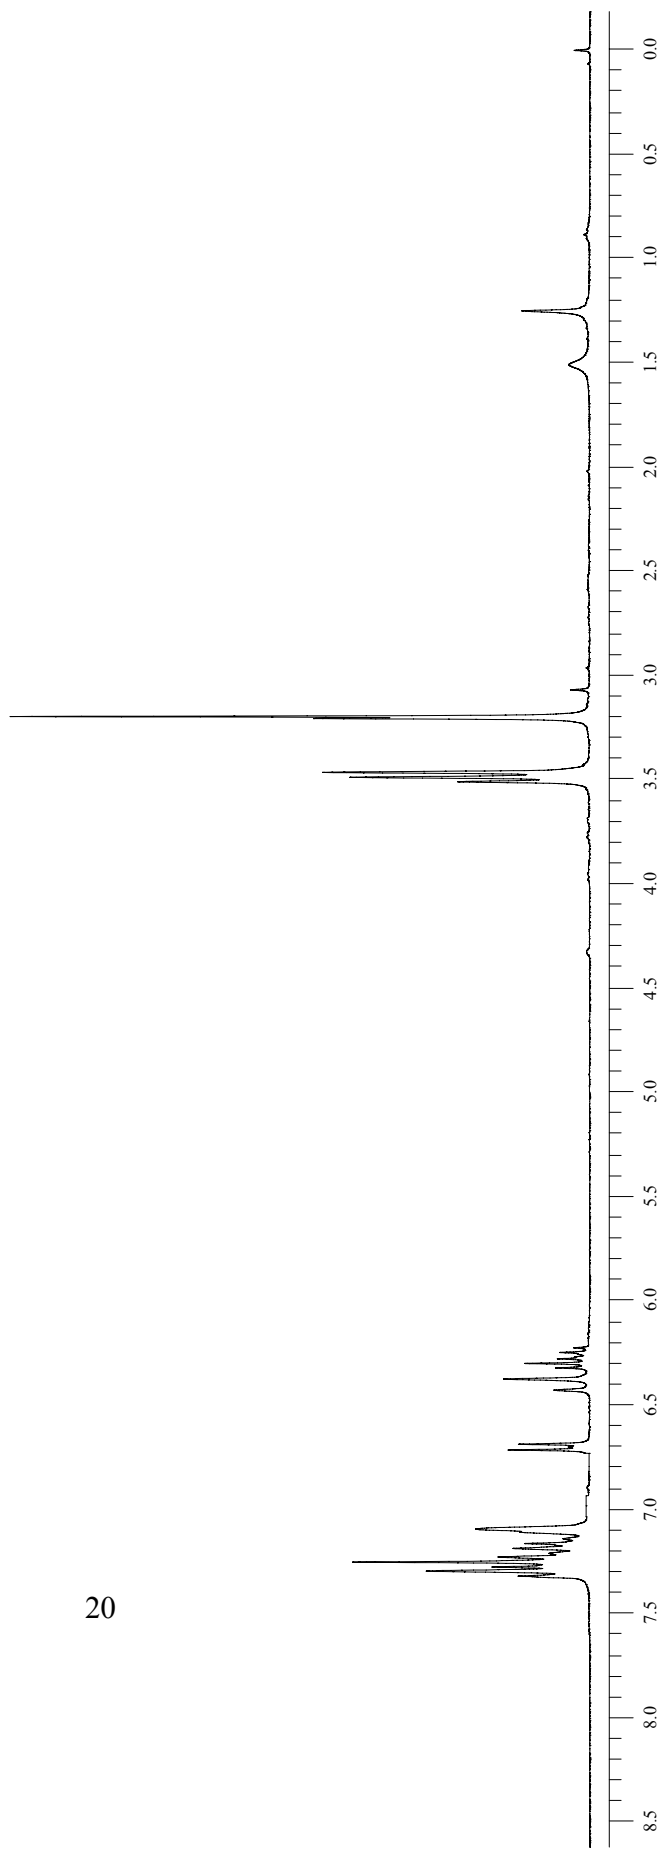

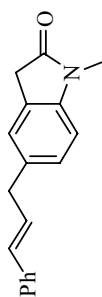

**3be**

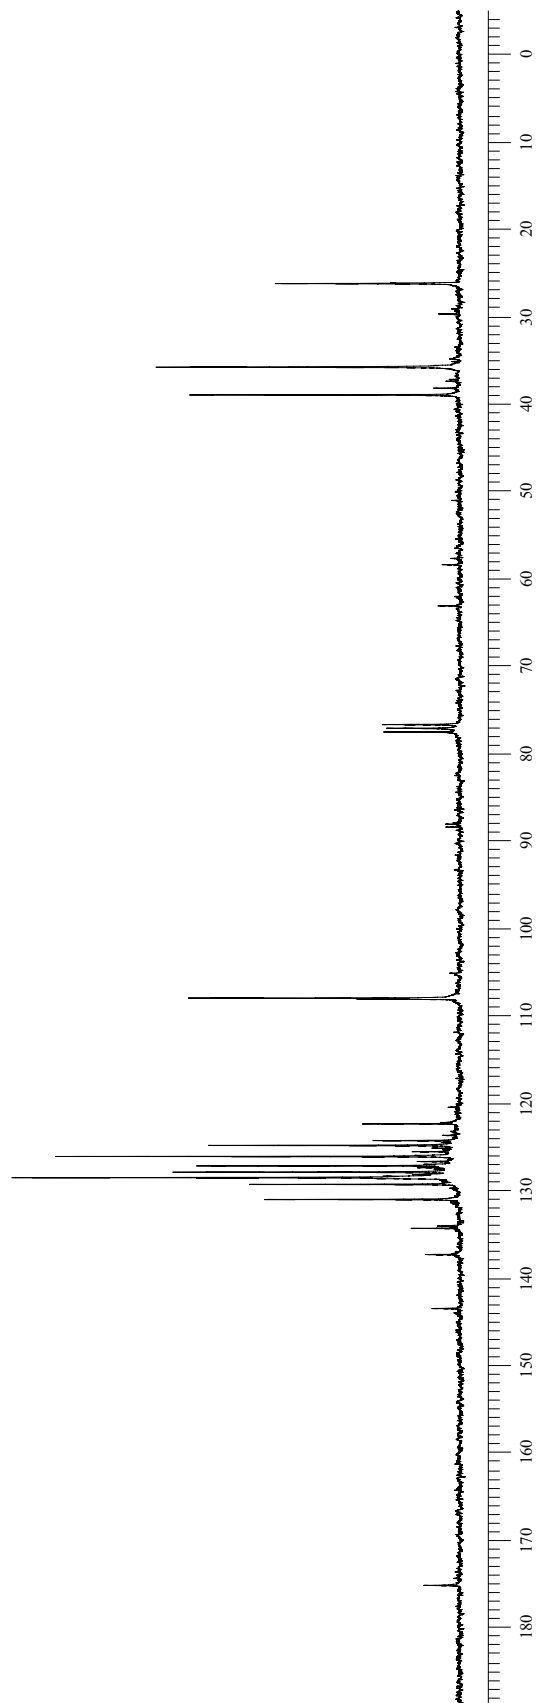

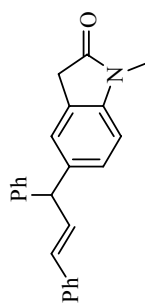

**3bf**

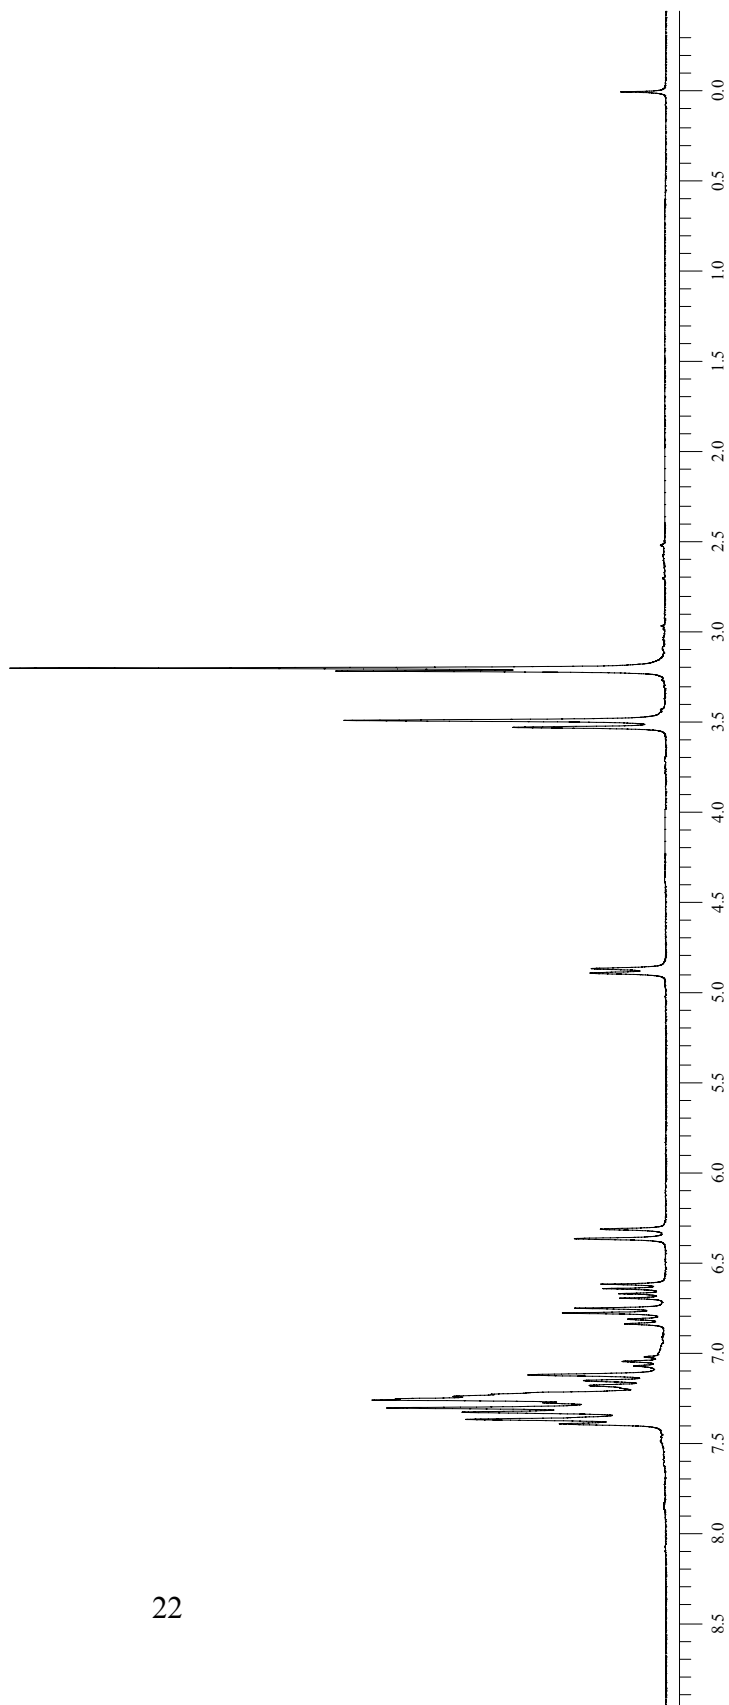

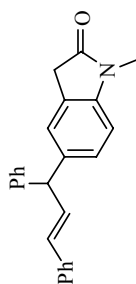

**3bf**

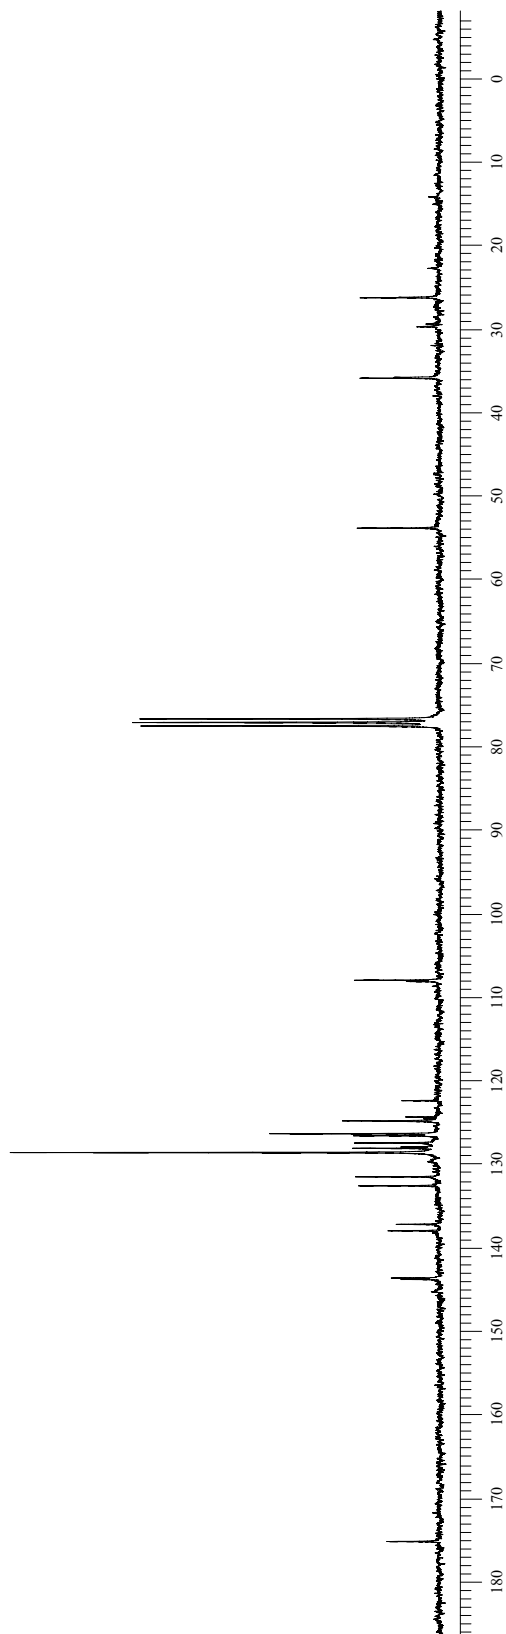

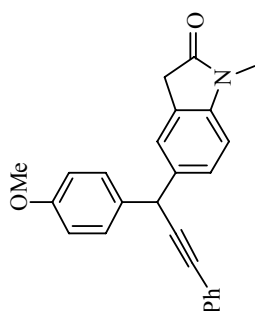

**3bg**

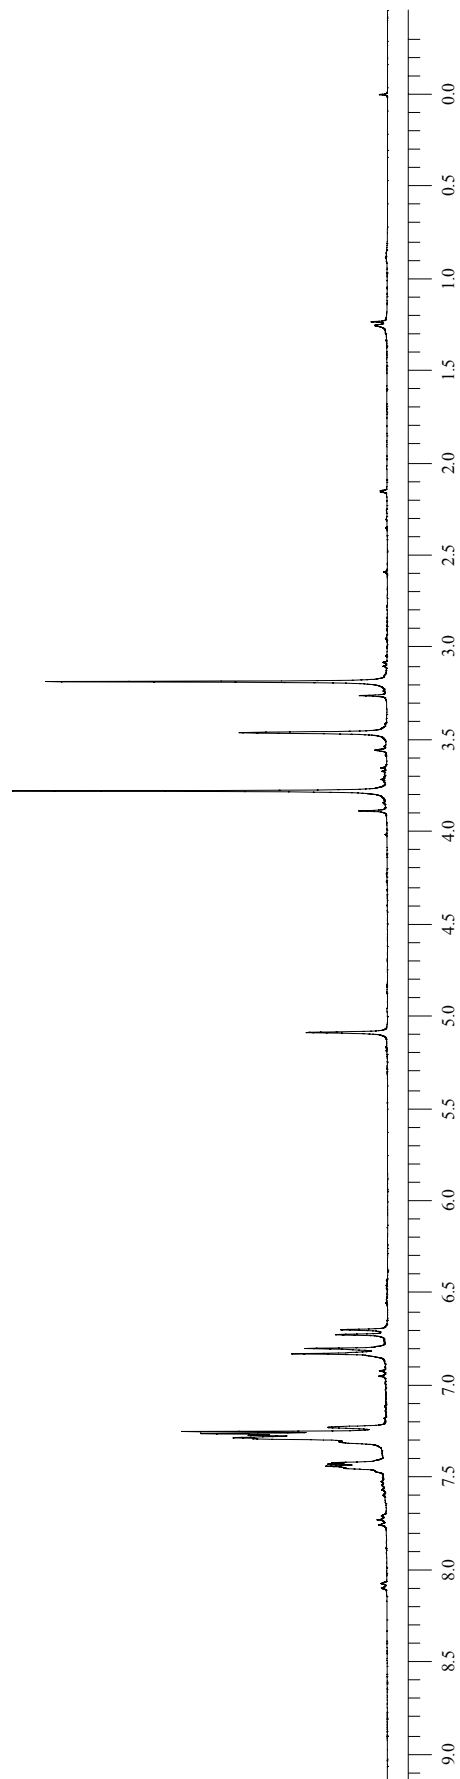



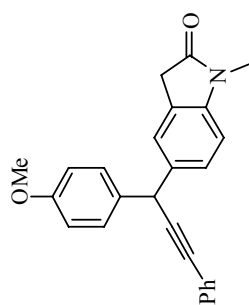

**3bg**

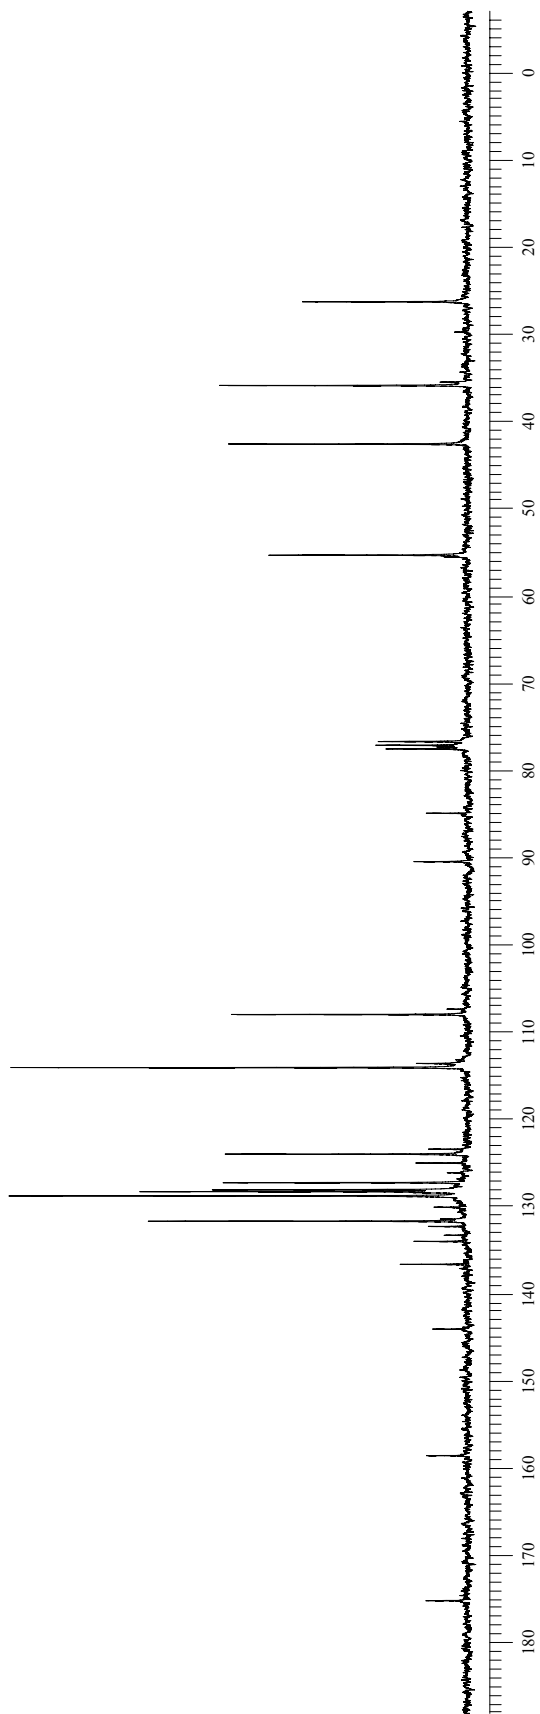

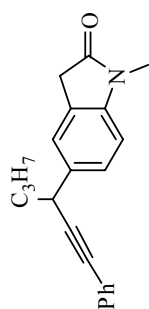

**3bh**

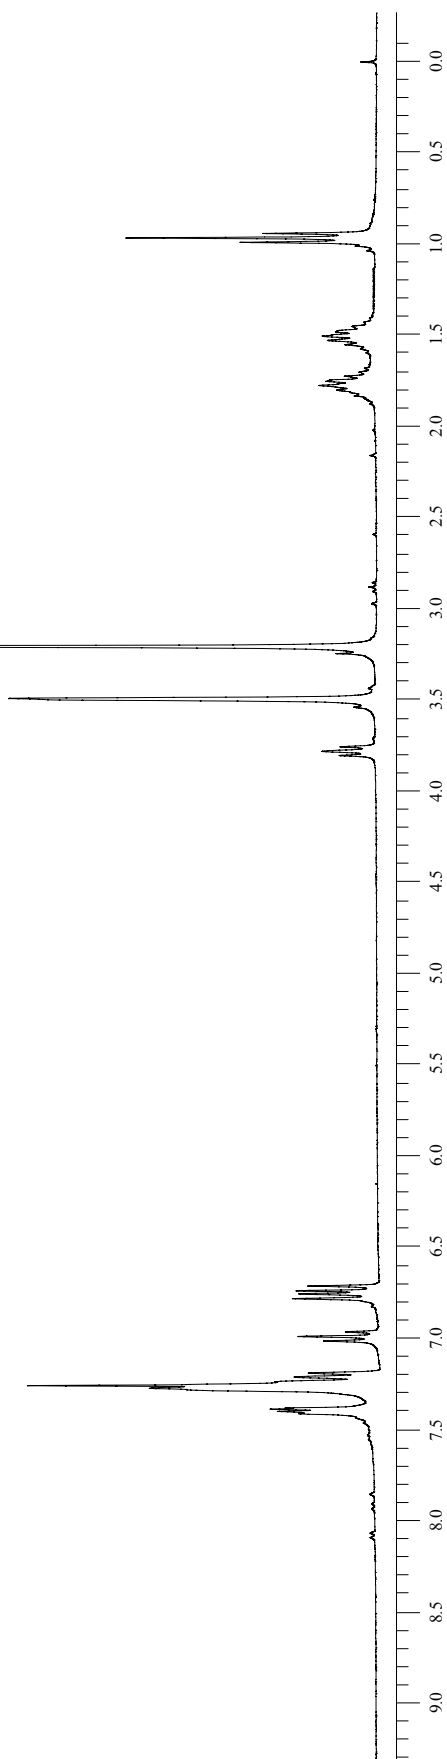

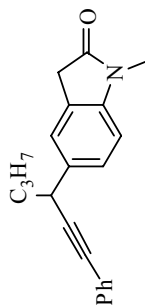

**3bh**

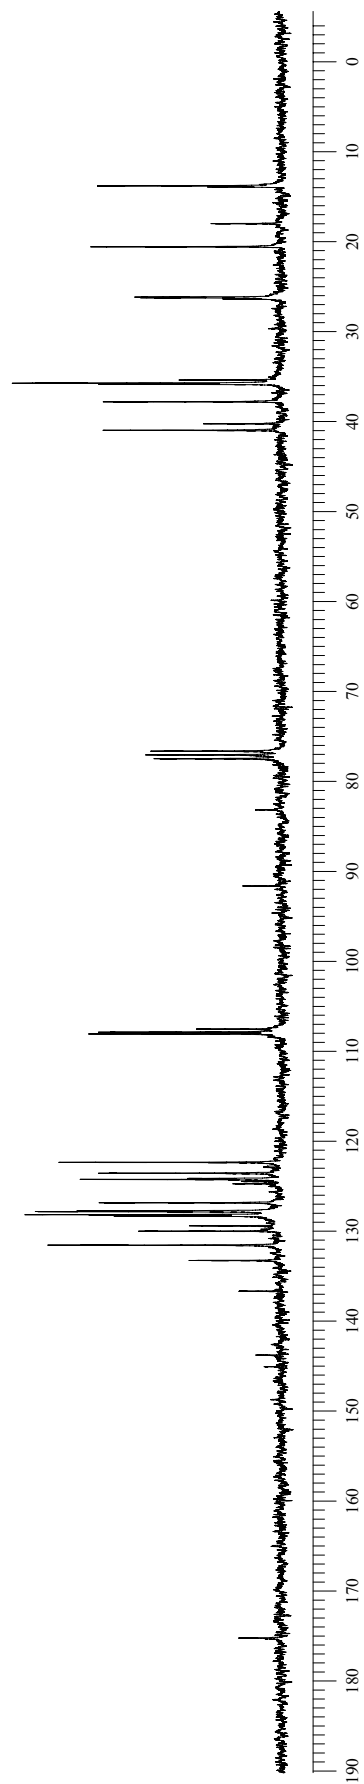

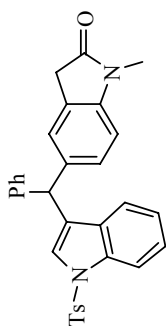

**3bi**

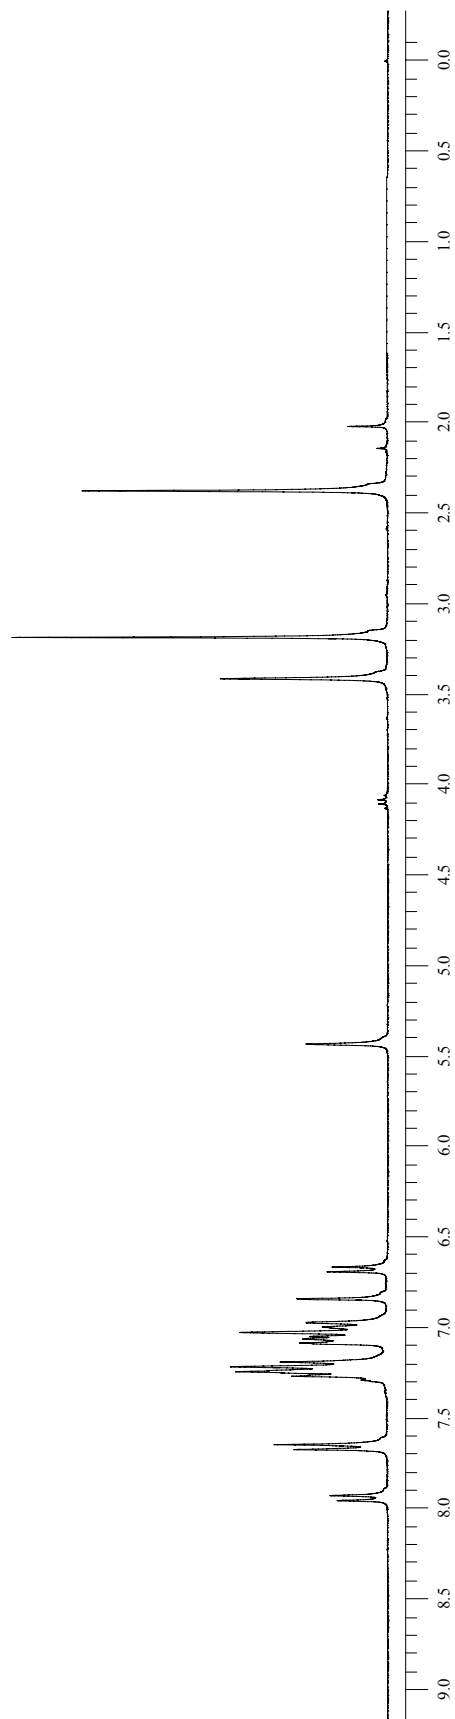

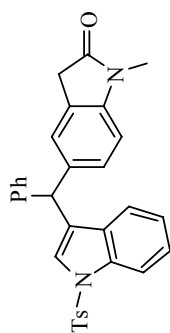

**3bi**

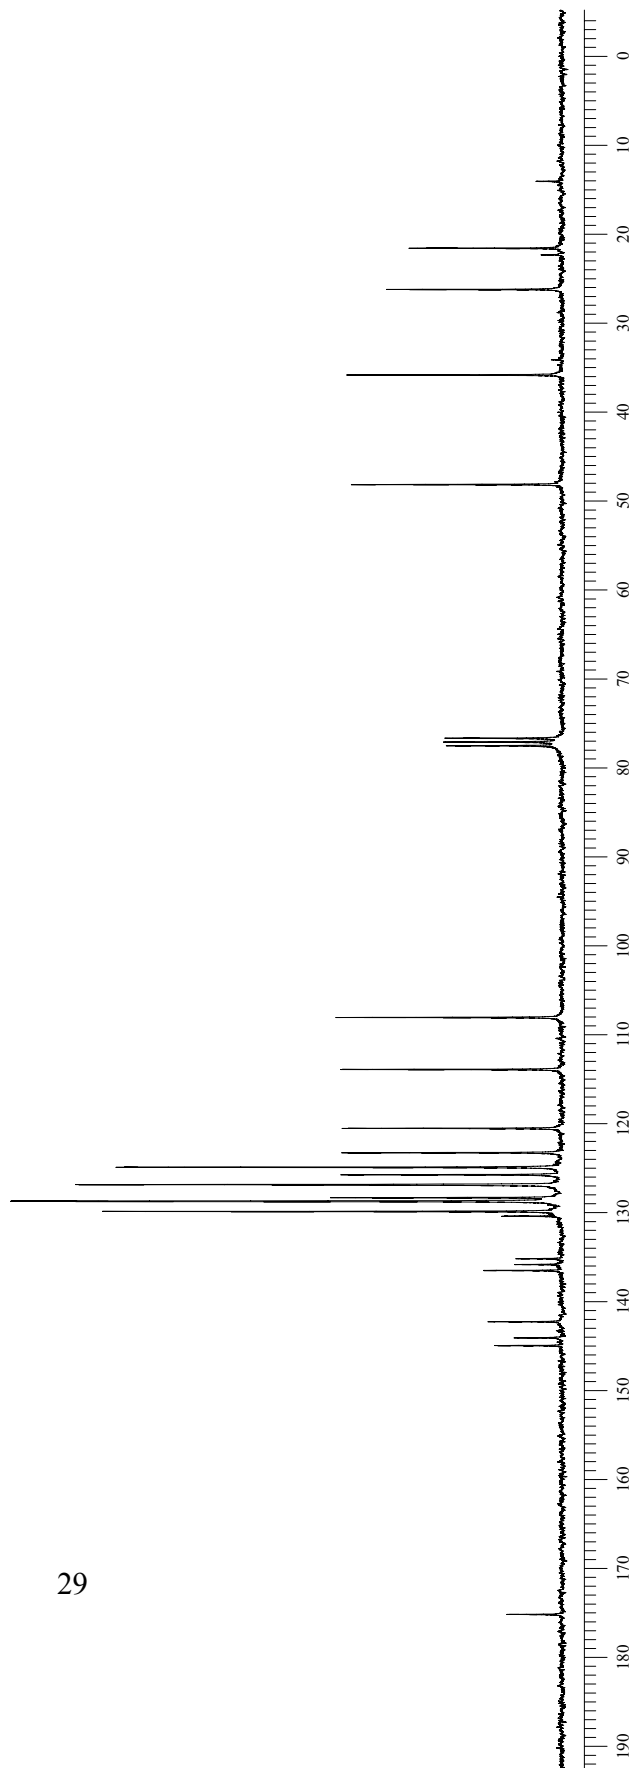

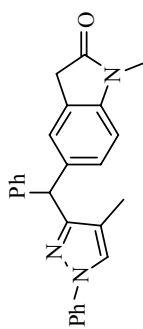

**3bj**

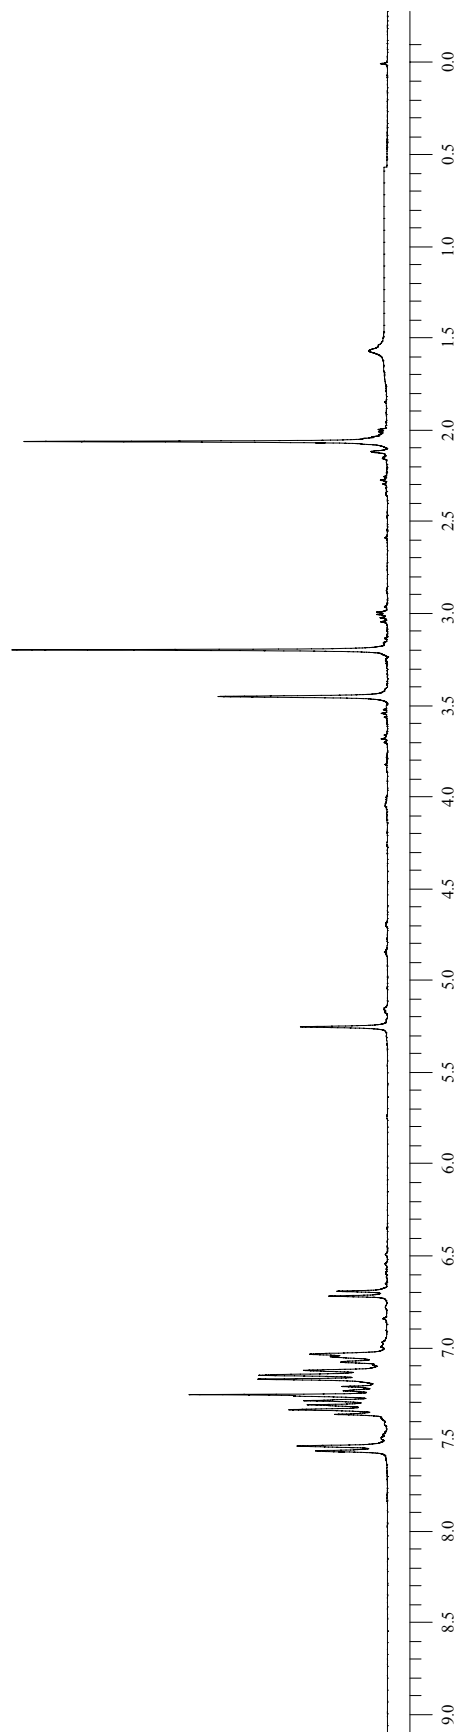

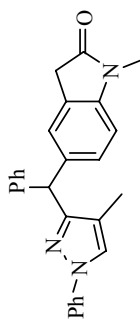

**3bj**

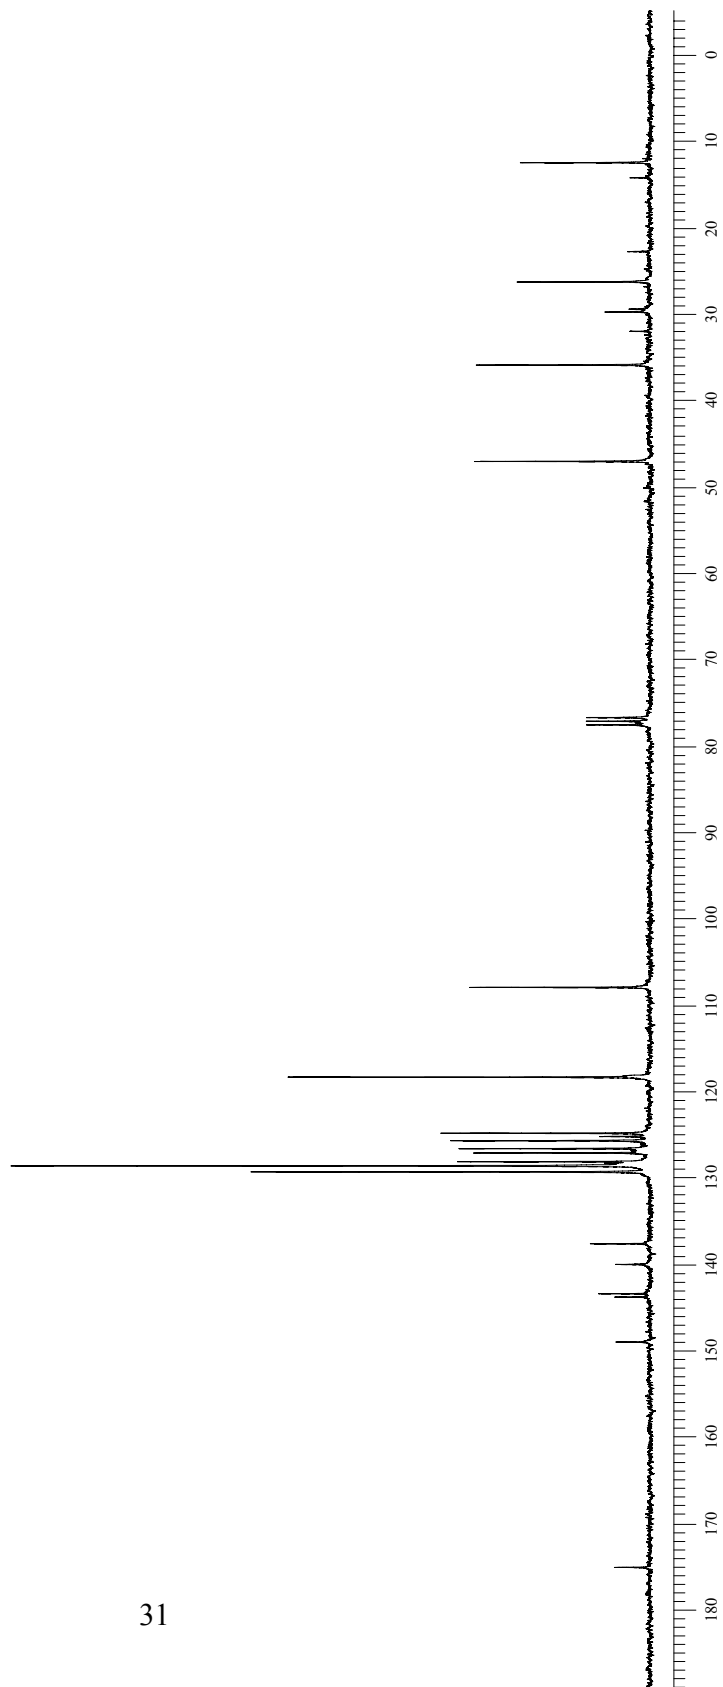

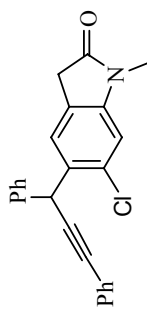

**3cb**

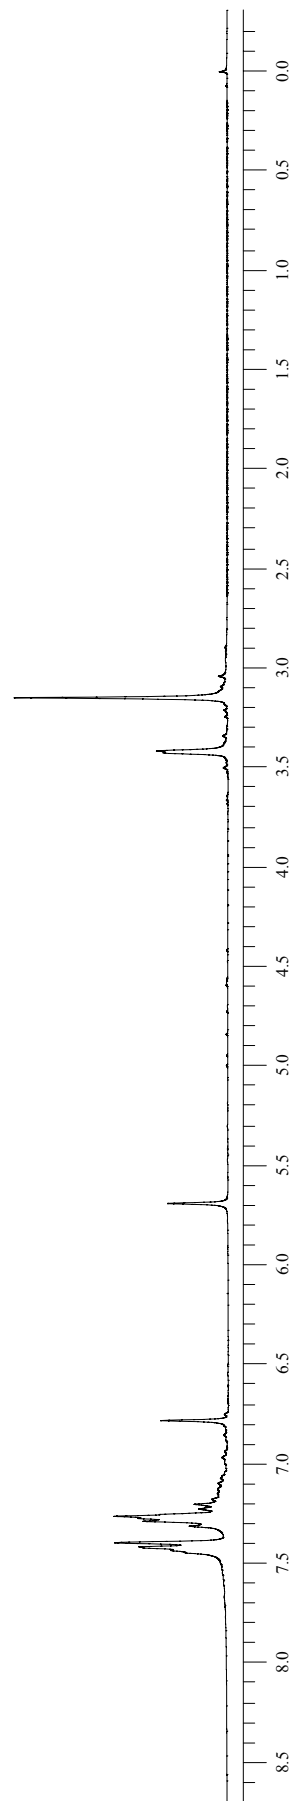



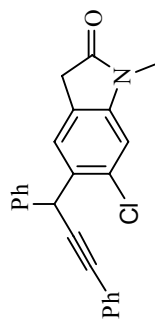

**3cb**

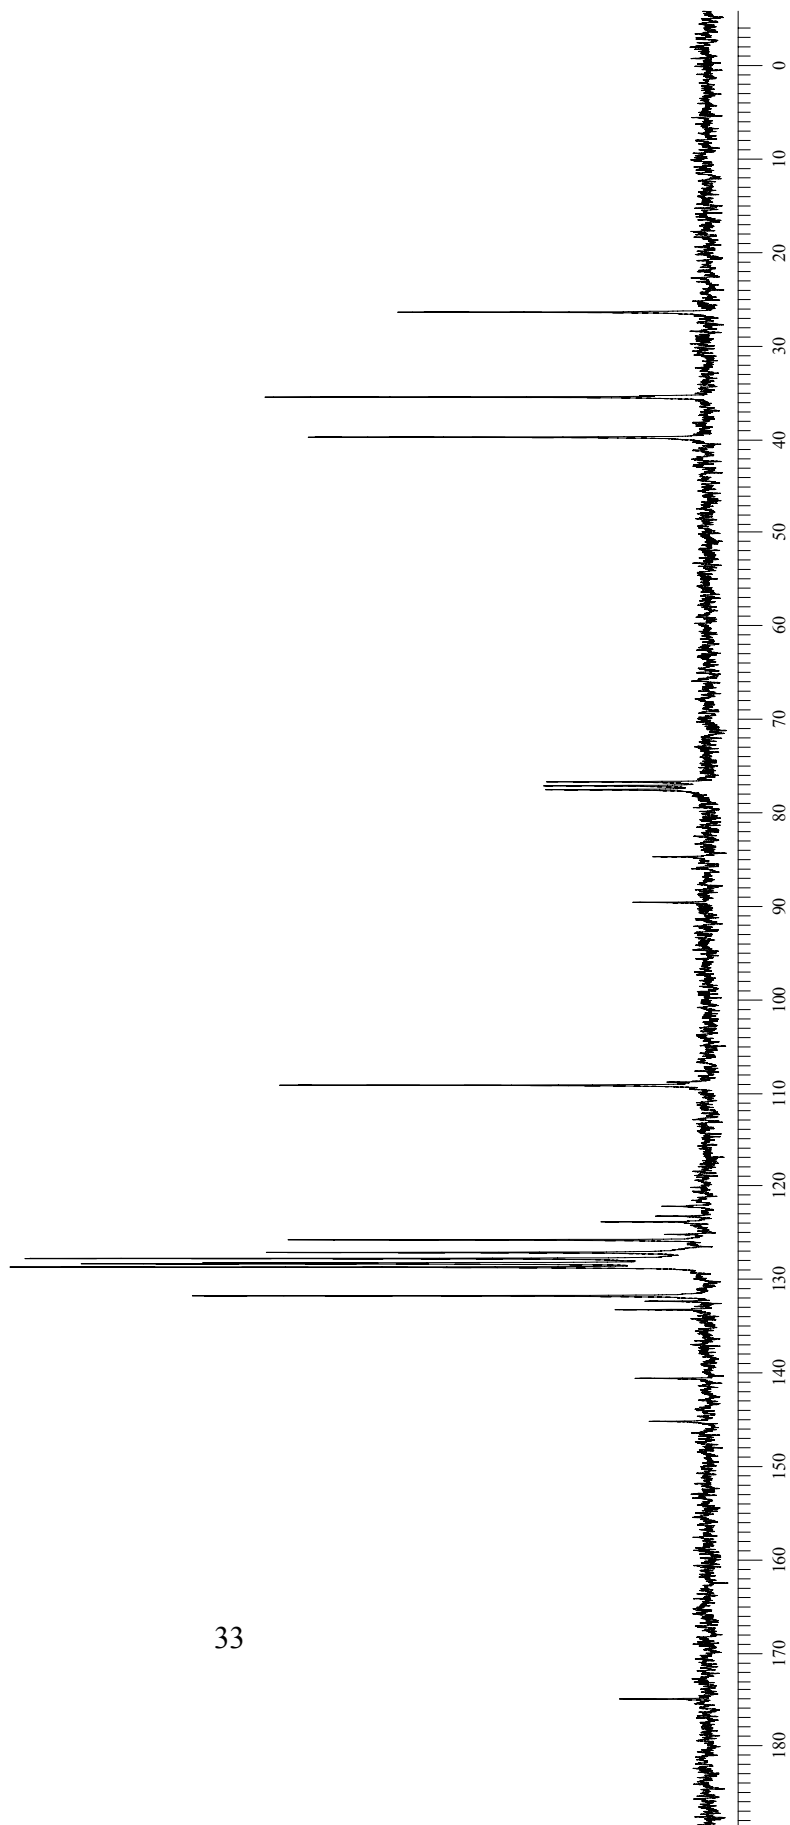

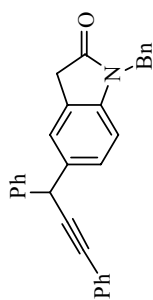

**3dlb**

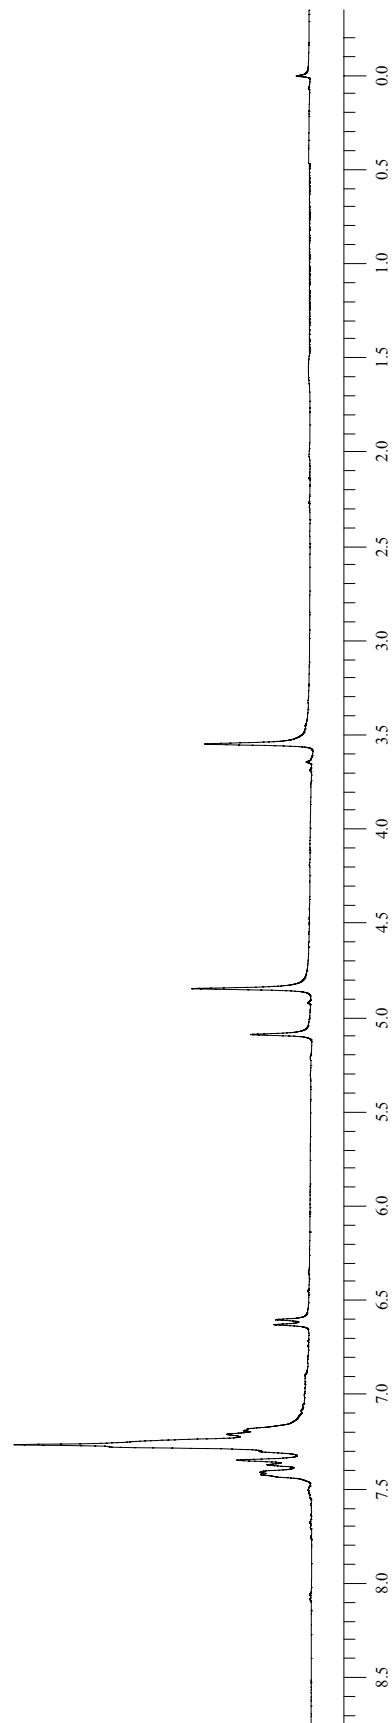

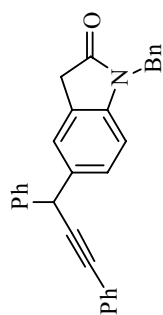

**3db**

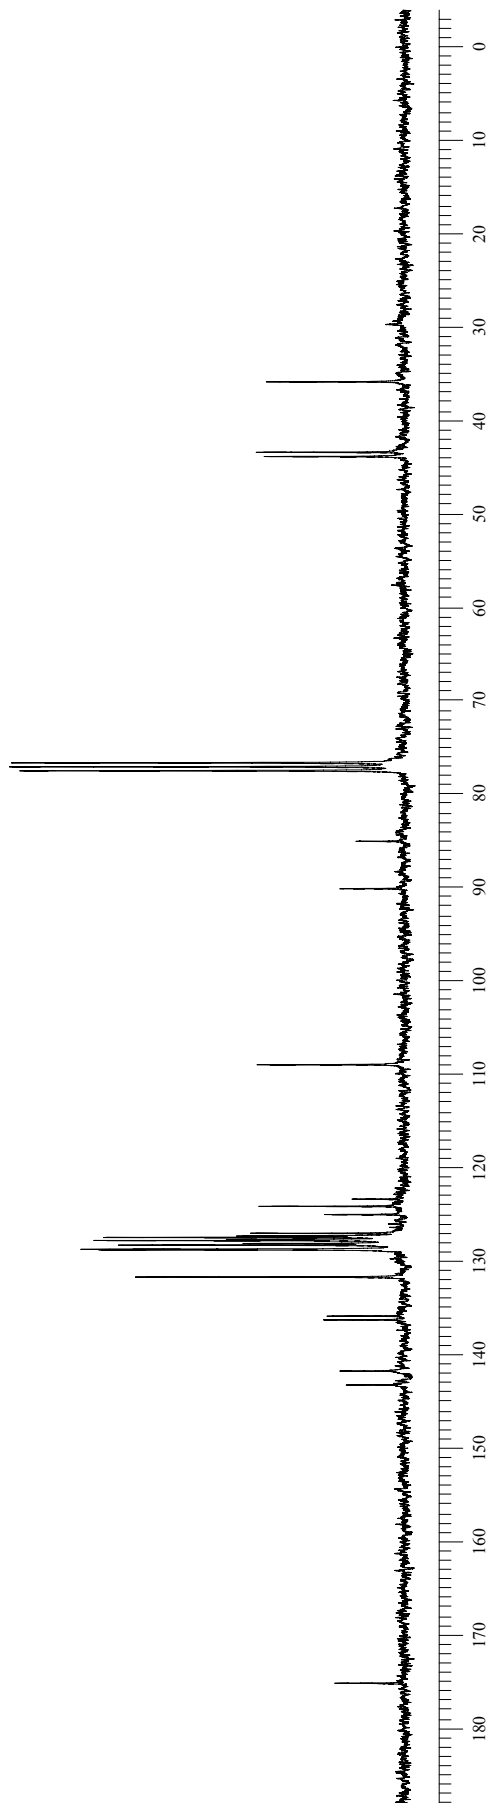

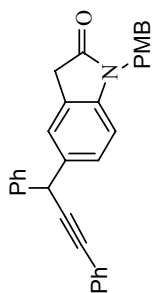

**3eb**

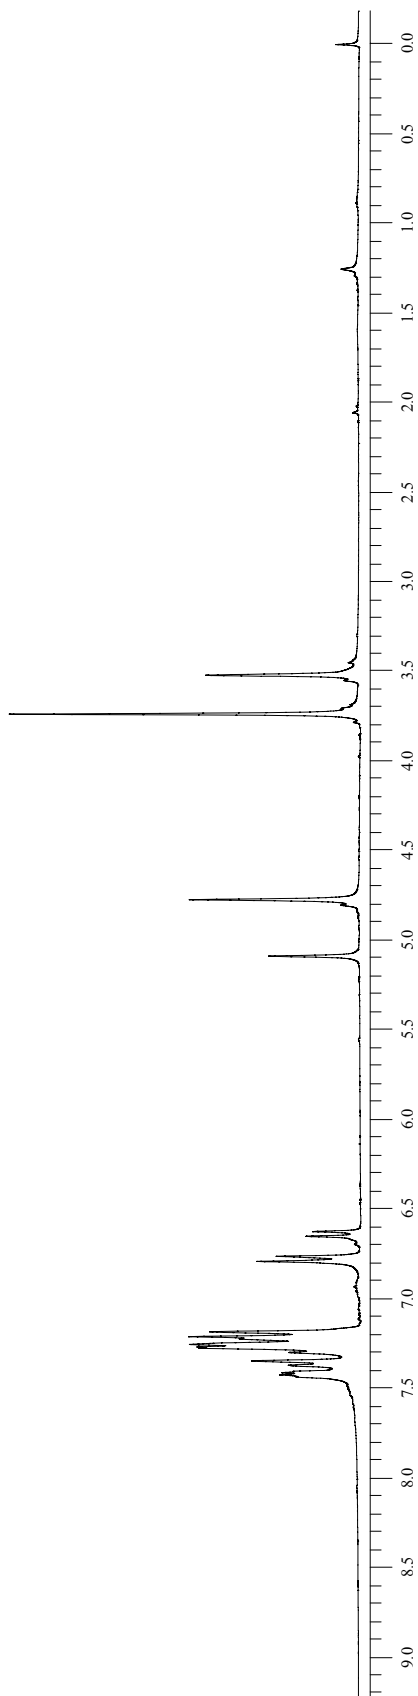

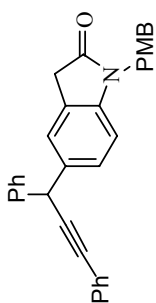

**3eb**

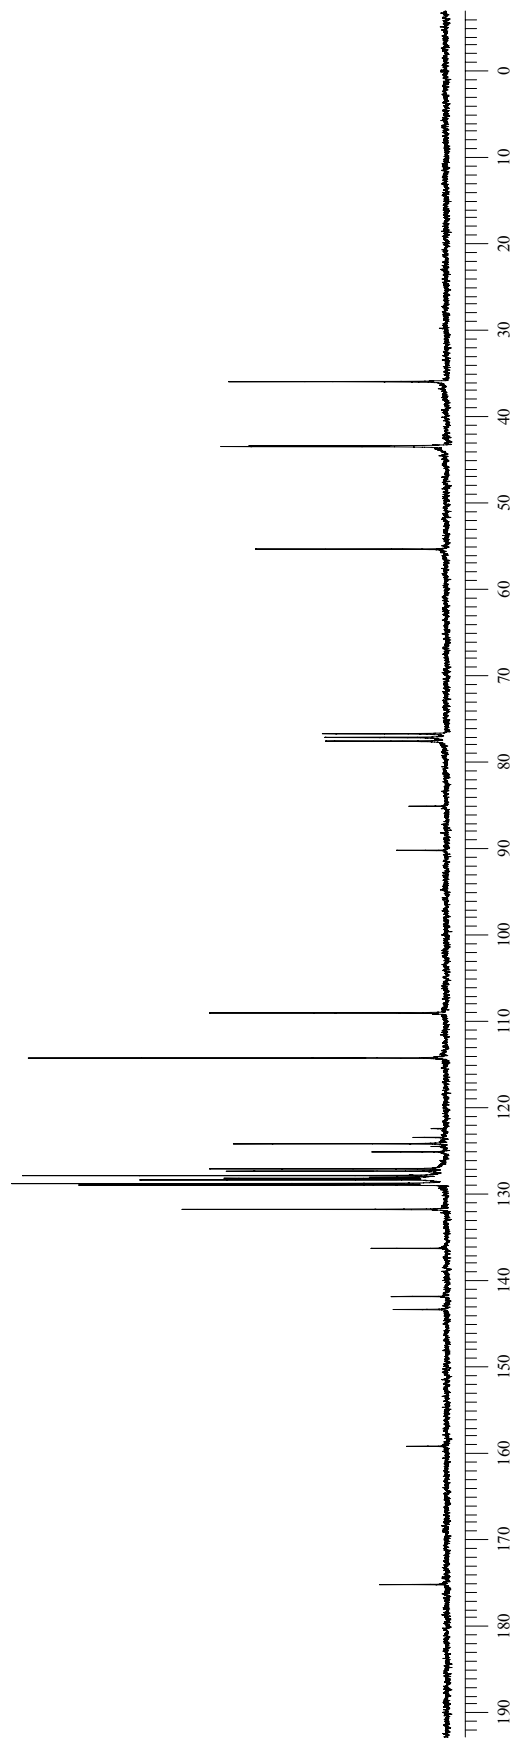

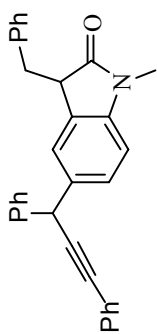

**3fb**

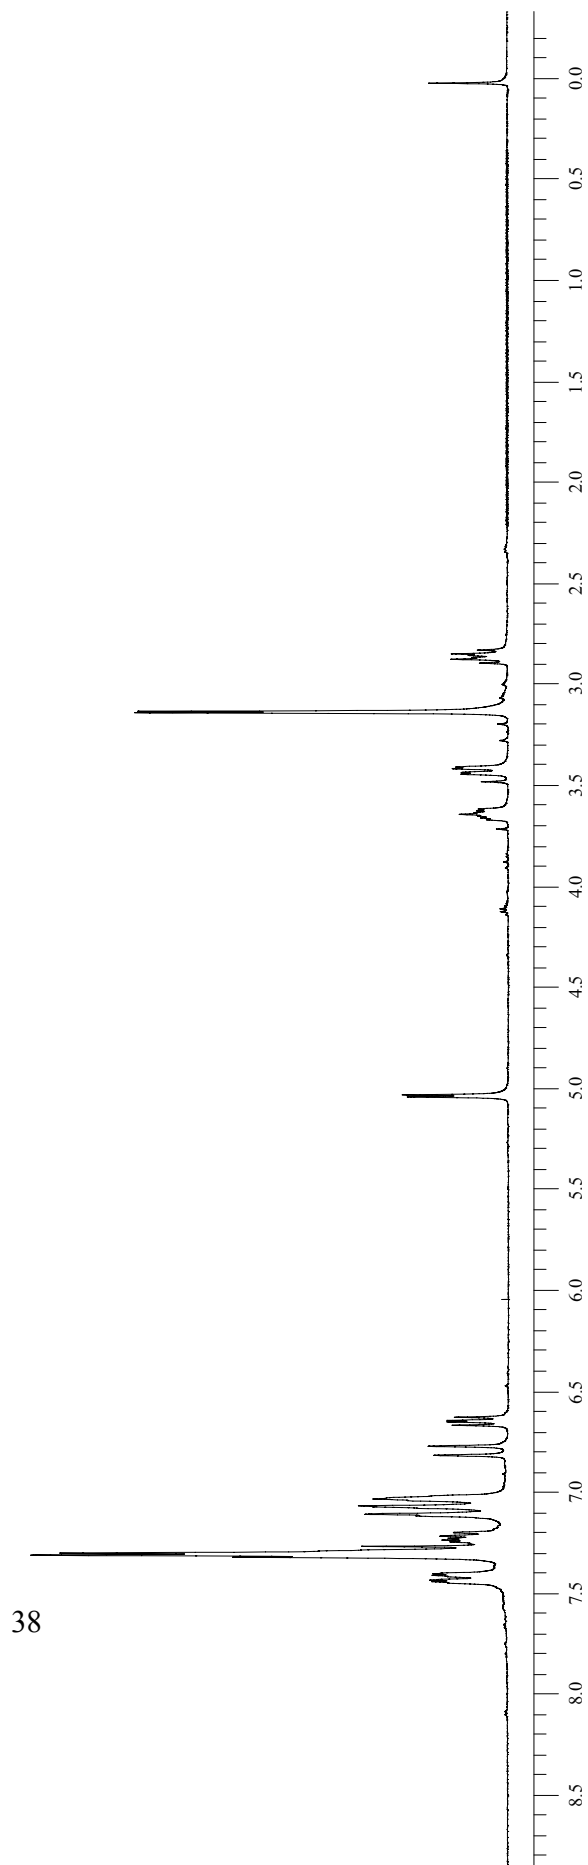

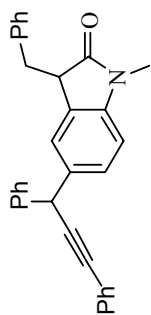

**3fb**

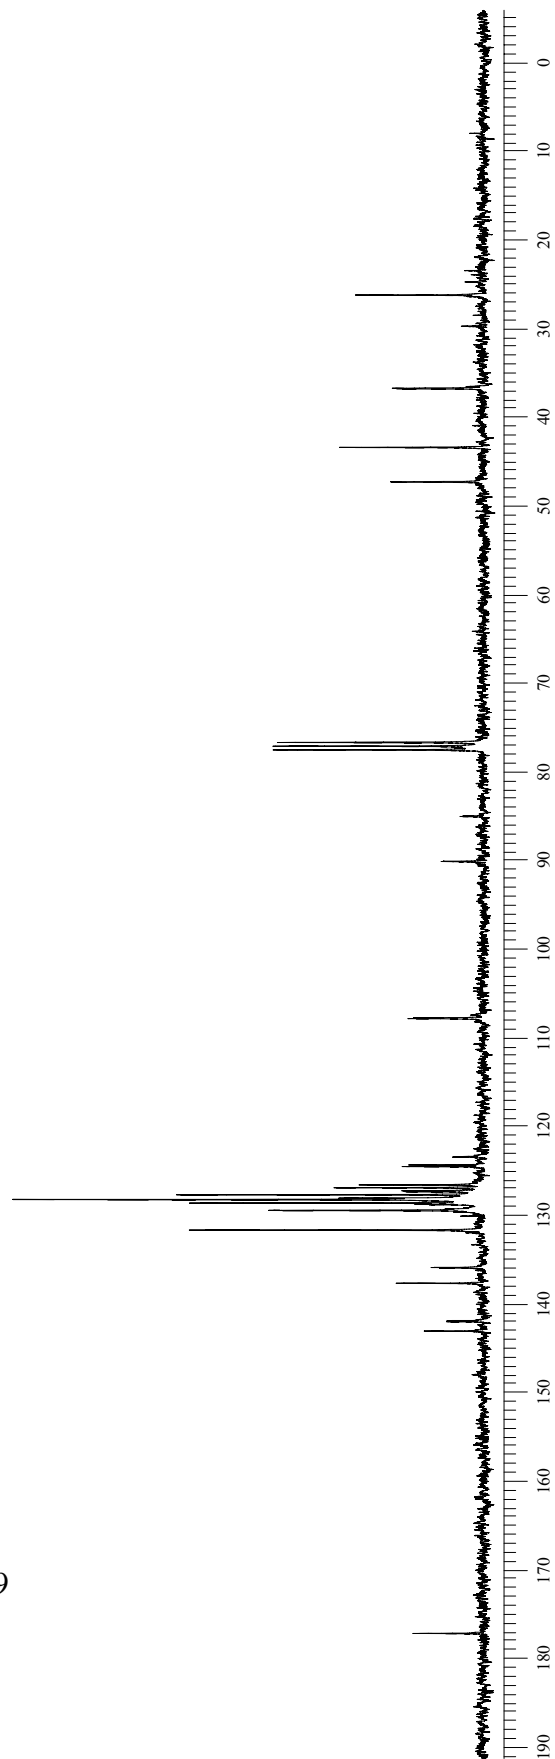





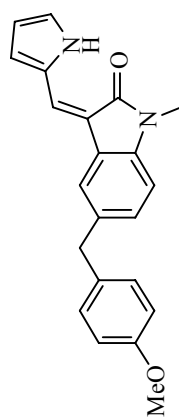

5a

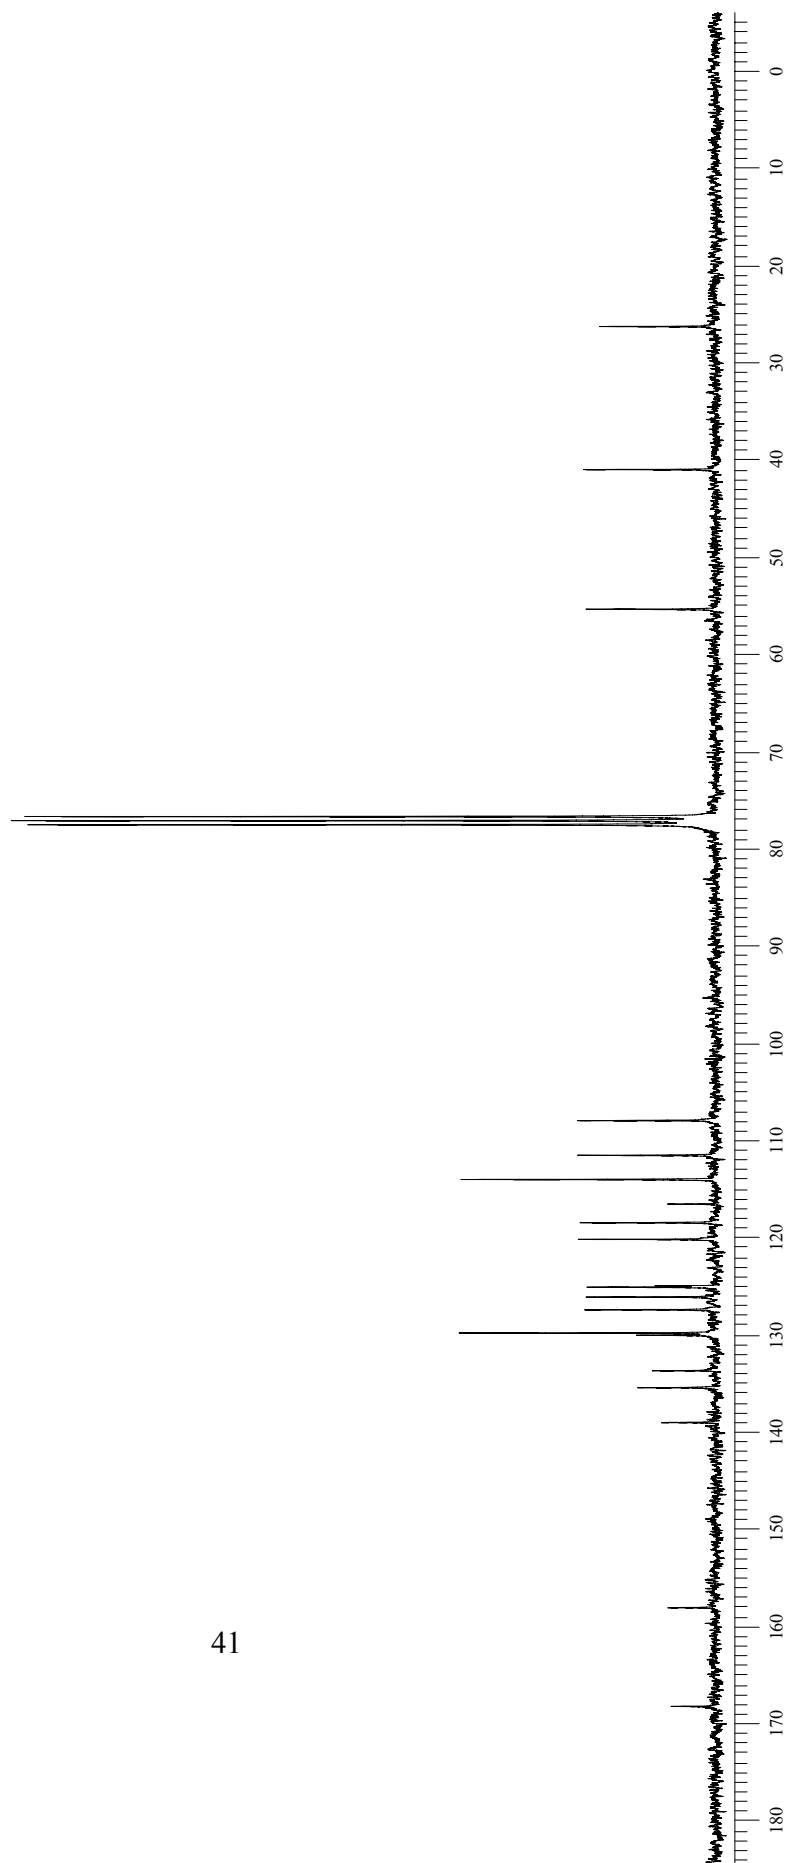

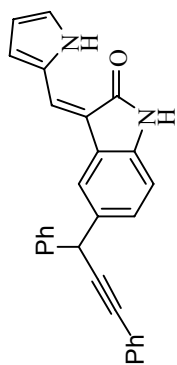

**5b**

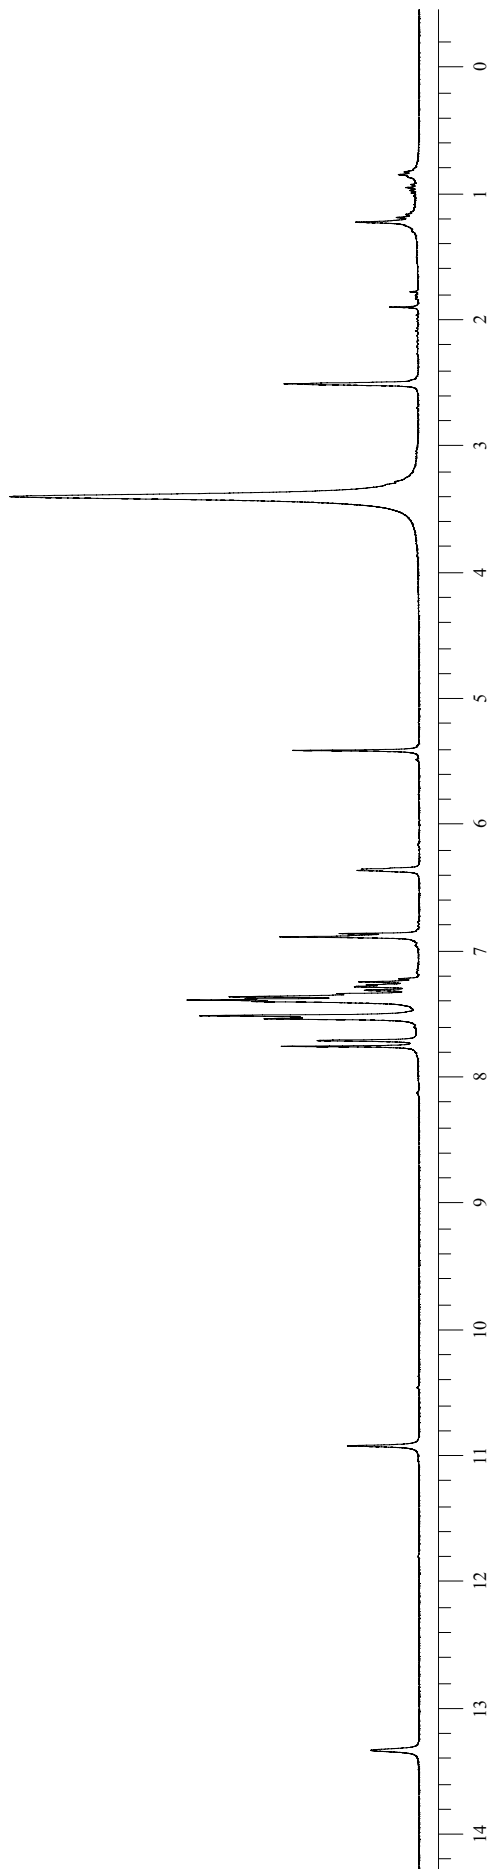

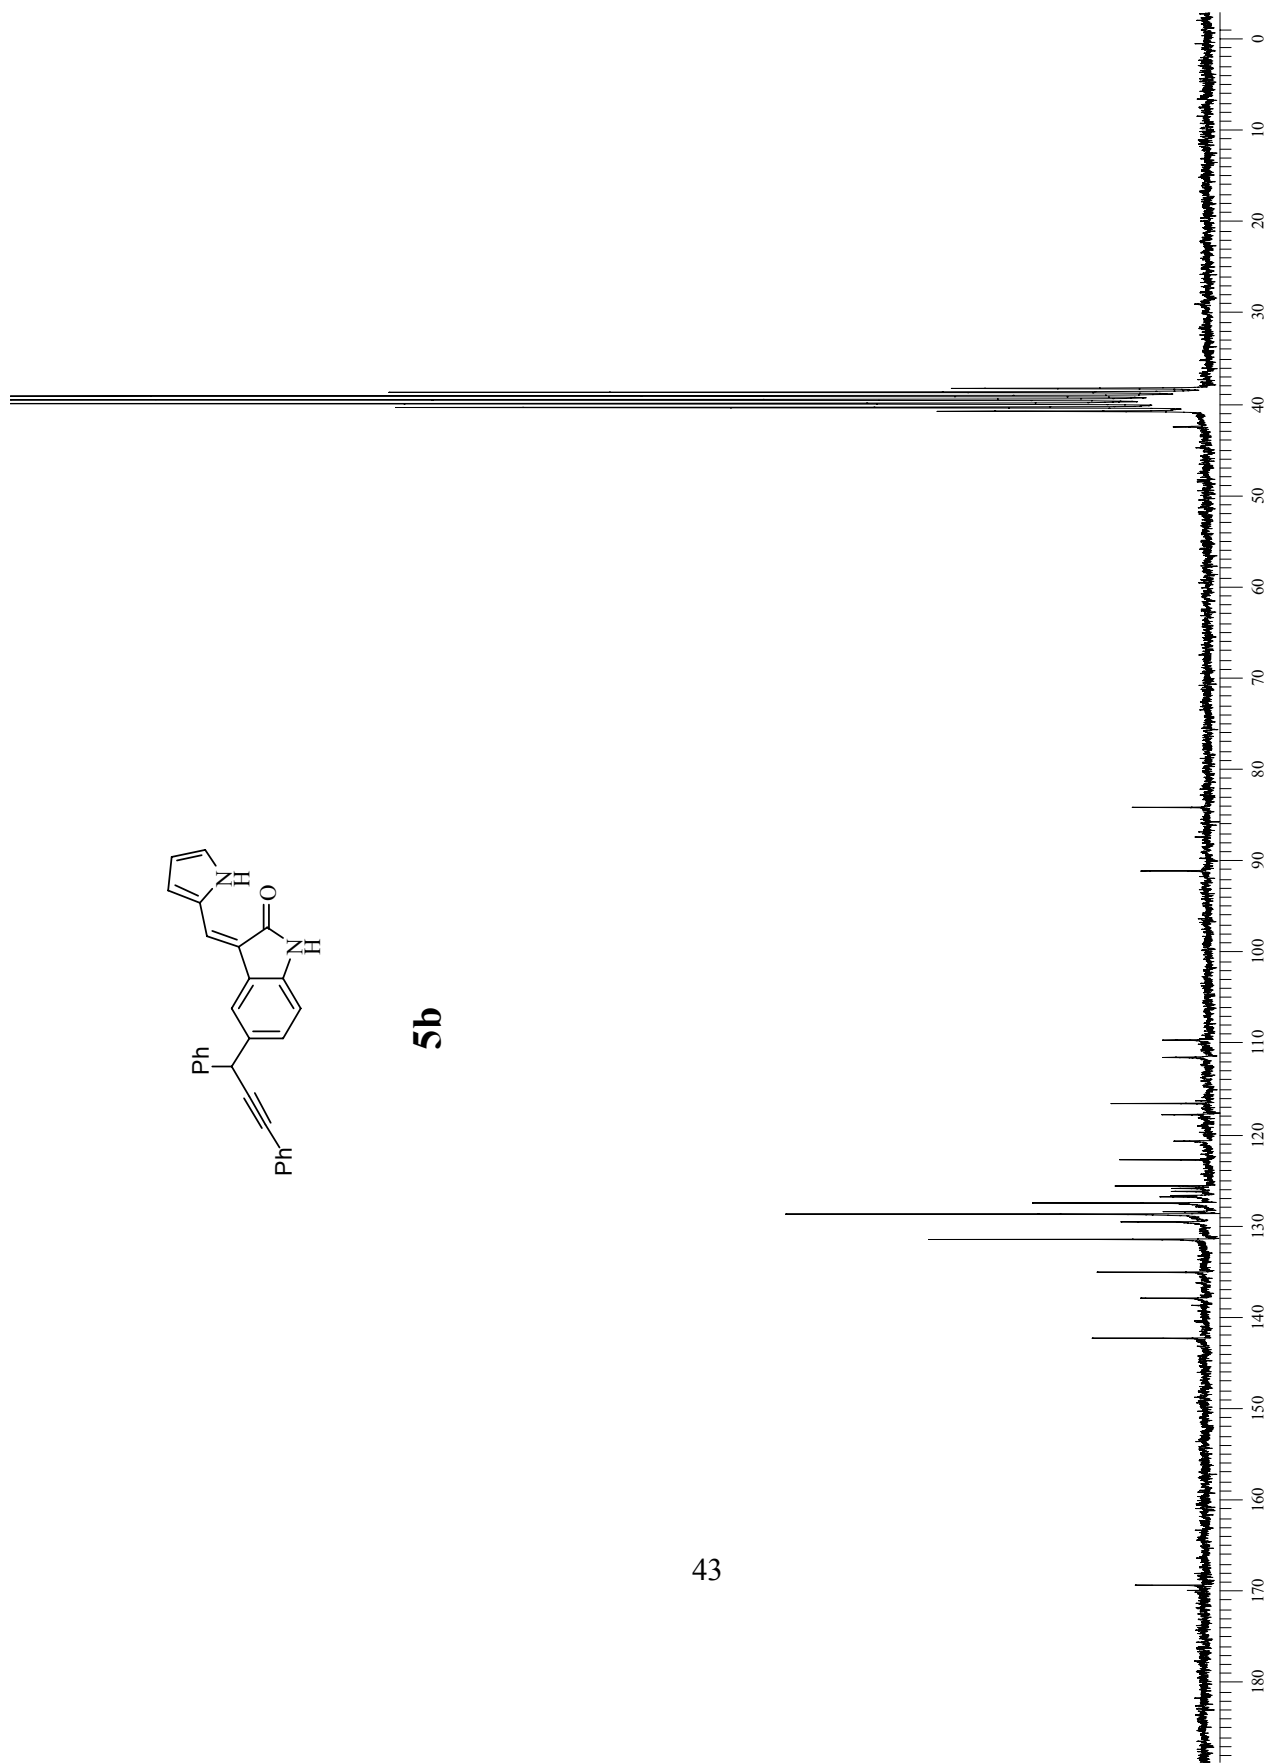

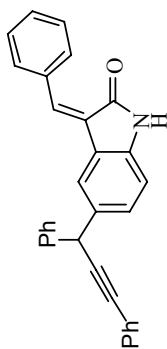

**5c**

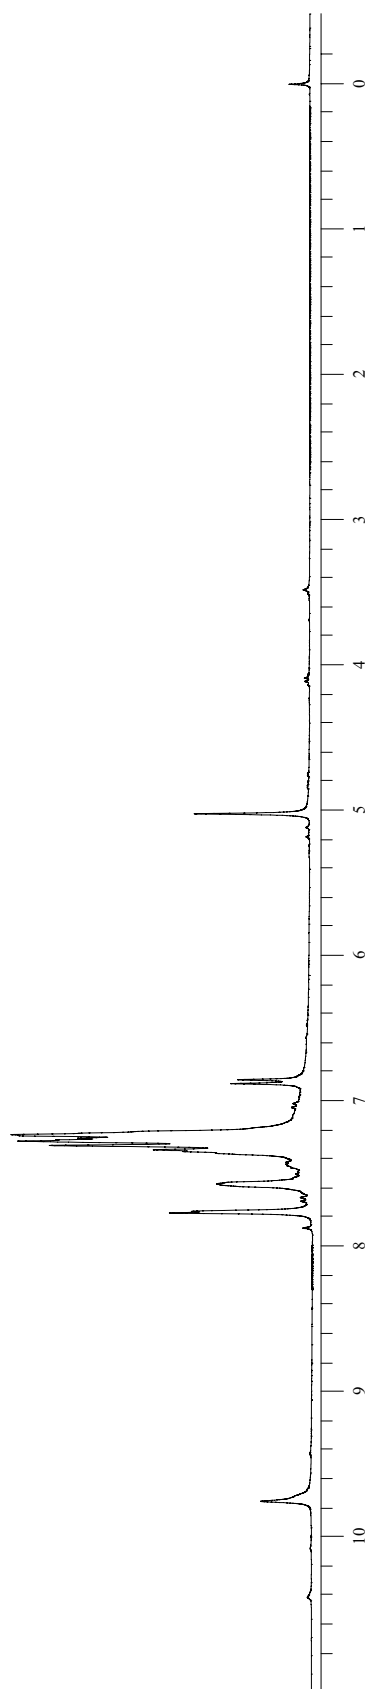

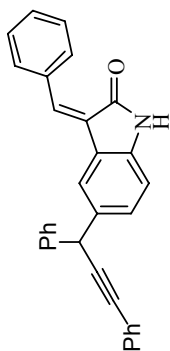

**5c**

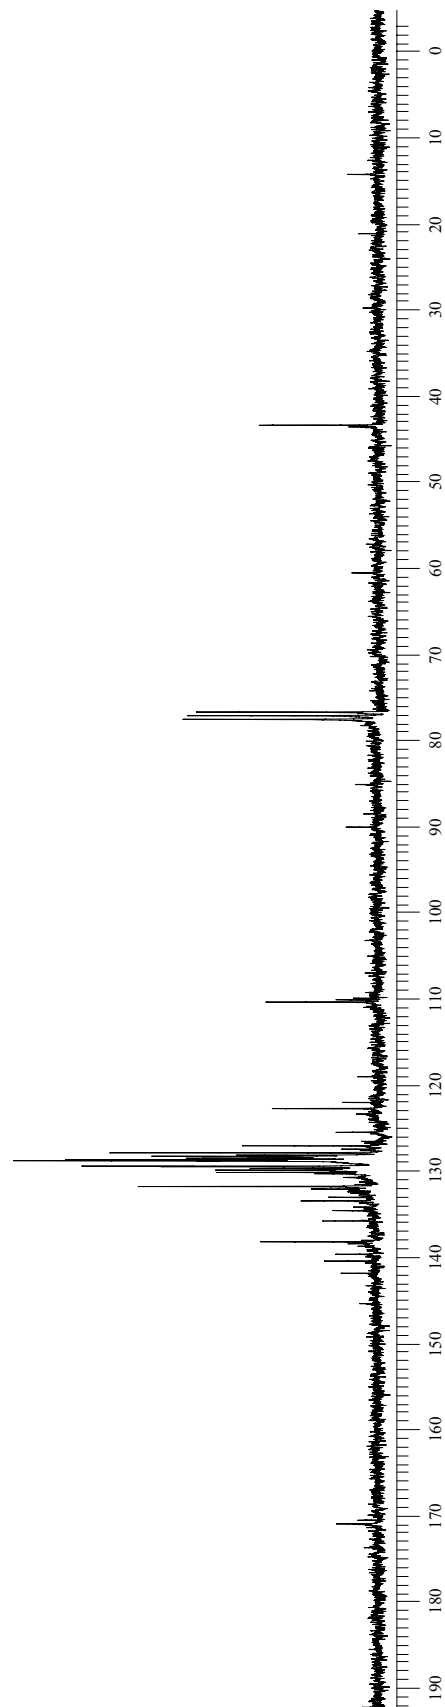

Supplementary Material (ESI) for Organic & Biomolecular Chemistry  
This journal is (c) The Royal Society of Chemistry 2011
